# Supplementary material
Source: PubMed Central journal article supplement (PMC5643582)
Supplement: NIHMS906603-supplement-Supplemental_Information.pdf [file NIHMS906603-supplement-Supplemental_Information.pdf]

## Supplementary Materials for

### **The long noncoding RNA *Wisper* controls cardiac fibrosis and remodeling**

Rudi Micheletti, Isabelle Plaisance, Brian J. Abraham, Alexandre Sarre, Ching-Chia Ting, Michael Alexanian, Daniel Maric, Damien Maison, Mohamed Nemir, Richard A. Young, Blanche Schroen, Arantxa González, Samir Ounzain,\* Thierry Pedrazzini\*

\*Corresponding author. Email: samir.ounzain@chuv.ch (S.O.); thierry.pedrazzini@chuv.ch (T.P.)

Published 21 June 2017, *Sci. Transl. Med.* **9**, eaai9118 (2017)

DOI: 10.1126/scitranslmed.aai9118

#### **The PDF file includes:**

##### Materials and Methods

Fig. S1. Conservation between the mouse and human *Wisper* transcripts.

Fig. S2. *Wisper* is expressed in the stressed fibrotic heart but not in the stressed fibrotic kidney.

Fig. S3. Effects of *Wisper* knockdown in neonatal CFs and CMs.

Fig. S4. TAD centered on the murine *Wisper* locus; long noncoding transcriptome after *Wisper* knockdown in fibroblasts; *Wisper* pulldown assay.

Fig. S5. Dose-response analysis after injection of GapmeRs targeting *Wisper* in vivo.

Fig. S6. Preventative *Wisper* depletion inhibits cardiac fibrosis and improves function.

Fig. S7. Expression of cardiac markers of stress after therapeutic depletion of *Wisper* in the infarcted heart; expression of myofibroblast genes in differentiating cardiac and dermal human fibroblasts.

Table S1. Echocardiographic parameters measured 1, 7, 14, and 28 days after MI.

Table S2. Echocardiographic parameters measured 4, 14, and 28 days in untouched mice injected with 5, 10, or 15 mg/kg of GM-Scrambled (control) or GM-*Wisper* (*Wisper*).

Table S3. Echocardiographic parameters measured 7 and 14 days after MI in mice injected with GapmeRs 3 days before MI.

Table S4. Echocardiographic parameters measured 7 and 28 days after MI in mice injected with GapmeRs 2 days and 9 days after MI.

Table S5. Characteristics of patients suffering from AOS and developing cardiac fibrosis.

Table S6. List of the primers used in this study.

**Other Supplementary Material for this manuscript includes the following:**

(available at

[www.sciencetranslationalmedicine.org/cgi/content/full/9/395/eaai9118/DC1](http://www.sciencetranslationalmedicine.org/cgi/content/full/9/395/eaai9118/DC1))

Table S7. Individual-level data and exact *P* values (Excel format).

## Material and Methods

### Primary cell culture and transfection

*Neonatal mouse CM and fibroblast isolation* - Neonatal C57B6 mice were sacrificed within the first 24h after birth and beating hearts were collected. Atria and great vessels were carefully dissected away and placed on ice in ADS buffer (H<sub>2</sub>O, NaCl 116 mM, HEPES 20 mM, NaH<sub>2</sub>PO<sub>4</sub> 1 mM, KCl 5.4 mM, MgSO<sub>4</sub> 0.8 mM, glucose 5.5 mM). The hearts were minced using a sterile sharp razorblade, and placed in a 1.5 ml-tubes (5-6 hearts per tube) containing 1 ml of PIB digestion buffer (ADS buffer; 0.05mg/ml collagenase type II (Worthington); 1mg/ml pancreatin; Sigma). Tissues were incubated at 37°C with shaking for 15 min. Supernatants were then collected in tubes containing complete medium (DMEM 75%, M199 25% ml, penicillin/streptavidin 1x, L-glutamine 1x, horse serum 10%, fetal cow serum 5%; Gibco). PIB buffer was added to undigested tissue fragments and digestion was repeated twice. Cells were collected by centrifugation at 800 rpm for 10 min at room temperature (RT). Pellet was then resuspended in an adequate volume of complete medium (2 ml each 5 hearts). Cells were then plated in 10 cm dishes for 45 min at 37°C, 10% CO<sub>2</sub> (pre-plating 1); after this step the non-myocytes adhere and the CMs remain in suspension. Supernatant was transferred to a new 10 cm dish and pre-plating step was repeated (pre-plating 2). After the second pre-plating the supernatant was collected in a new tube, CMs were counted and seeded on gelatin coated 3.5 cm plates ( $3 \times 10^5$  cells per dish). The non-myocytes fraction was cultured in fibroblast medium (DMEM, fetal cow serum 10%, penicillin/streptavidin 1x) and seeded into 10 cm dishes. Cells were split using trypsin to minimize CMs contamination. Confluence was maintained below the 85% and medium was changed every second day.

*Adult mouse cardiac fibroblast isolation*- 12-week old C57/BL6 were injected with 100 U of heparin (Liquerin) 30 min before being sacrificed to avoid blood coagulation in the heart. Beating hearts were removed and washed in cold PBS. Then, hearts were cannulated through the aorta and the vessel was tied using a surgical rope. Using a 1 ml syringe, HBSS solution (hanks balanced salt solution, GIBCO) was pumped in the heart through the aorta in order to wash out the blood. In the same way, 1 ml of digesting solution (HBSS; 2 mg/ml Collagenase type II (Worthington); 0.05 mg/ml Protease XIV; Sigma)) was pumped in the heart followed by 5 min of digestion at 37°C. This step was performed 3 times each heart. After the third digestion, the

atria and big vessels were removed and the remaining ventricles were minced and resuspended in complete medium (DMEM, penicillin/streptavidin 1x, fetal cow serum 10%). The solution was pipetted up and down 10-20 times to reach a single cell suspension and the supernatant was collected avoiding undigested pieces. Cells were collected by centrifugation at 800 rpm for 10 min at RT. The pellet was resuspended in adequate volume of complete medium and cells were plated in 10 cm dishes overnight (pre-plating 1). After this step, the non-myocytes adhere and the CMs remain in suspension. Supernatant was transferred to a new 10 cm dish and pre-plating step repeated for another 24 h (pre-plating 2). Fresh complete medium was added to the pre-plating dishes to culture the non-myocytes cells and the supernatant was discarded. Cells were split to maintain a confluence not over the 85% and medium was changed every two days.

*Mouse lung and tail fibroblast isolation-* The lungs and the tail tips were collected from 12 weeks old C57/BL6 and washed in HBSS (Gibco). They were both minced using a sterile and sharp razorblade, and placed in a 2 ml tubes (2 lungs per tube or 5 tails per tube) containing 1 ml digestion buffer (HBSS + 10 mg/ml Collagenase type II, Worthington). Cells were incubated at 37°C with shaking for 40 min. After digestion fibroblast medium (DMEM, Fetal Cow Serum 10%, Penicillin/streptavidin 1x) was added and cells were collected by centrifugation at 800 rpm for 10 min at RT. The supernatant was discarded. The cellular pellet was resuspended in proper volume of fibroblast medium and then filtered into a 70um strainer to remove undigested pieces. Cells were counted and seeded in 10 cm dishes. Cells were split to maintain a confluence not over 85% and medium was changed every two days.

*Human fibroblasts-* Adult human dermal fibroblasts were purchased (Gibco). Primary cell cultures of human CFs were obtained by mechanical tissue enzymatic digestion with collagenases (Roche) and explant outgrowth from atrial samples obtained as discarded surgical tissue. Cultures of primary CFs were shown to express specific fibroblasts markers (i.e. vimentin) and to respond to TGF- $\beta$  (1 ng/mL) stimulation. Cells were plated at a density of 5000 cells/cm<sup>2</sup> and maintained in a fibroblast medium (low glucose DMEM (Gibco) with fetal bovine serum (10%; Sigma), fibroblast growth factor-2 (FGF-2; 5.8  $\mu$ g/ $\mu$ L; Peprotech) glutamine (2.5 mM; Gibco) penicillin/streptomycin (1%; Gibco), Fungizone (0.1%; Gibco) and HEPES (1.5%; Lonza). Medium was changed every 48 hours. Once cells reached a 60-70% confluence cells were starved in medium without fetal bovine serum (and FGF-2 0.285  $\mu$ g/ $\mu$ L) for 2, 4, 8, 14, 24 or 40 hours. Subsequently, cells were collected for further analysis. Human dermal fibroblasts

were used in passages between 3 and 6 and human CFs in passages 2 to 4. Between 6 and 10 independent samples were analyzed for each condition.

*GapmeR transfection in mouse primary cell-* Adult CFs, neonatal CFs and lung fibroblasts ( $3.5 \times 10^5$  cells per 3.5 cm dish; passage 2) and CMs ( $1 \times 10^6$  cells per 3.5 cm dish) were cultured overnight. The next day, medium was changed two hours before transfection. Then, a final concentration of 10 nM (if not differently specified in the text) of LNA IncRNA GapmeRs (GapmeR-*Wisper* or GapmeR-negative control A or GapmeR-*Wisp2*) (Exiqon) was transfected on cells using Xtreme gene HP DNA transfection reagent (Promega). After 48 hours, medium was changed and cells were collected for future experiments. Total RNA was obtained using miRNeasy kit (Qiagen) and the knock down confirmed by qRT-PCR.

*GapmeR transfection in human CFs-* Transfection was performed in 25 cm<sup>2</sup> flasks in cells at 80% confluence. A final concentration of 25 nM of LNA IncRNA GapmeRs (GapmeR-*Wisper* or GapmeR-negative control A; Exiqon) was transfected on cells using Xtreme gene HP DNA transfection reagent (Promega) in complete medium. After 24 hours, cells were kept in normal medium or exposed to serum starvation for another 24 hours, and subsequently were collected for further studies. Three independent samples were analyzed for each condition.

### **Animal experiments – Tissue collection and preparation**

Mice were sacrificed by deep anesthesia followed by cervical dislocation, and organs were collected. Hearts were dissected from sham and MI mice at different time points after artery ligation. Atria and big vessels were eliminated. The remaining ventricles were rinsed in diethylpyrocarbonate (DEPC)-treated PBS to minimize residual blood contamination. Furthermore, the ventricles were divided in 3 parts: top section (from the top to the ligature), central section (from the ligature to the center of the infarcted area) and the tip of the heart (from the center of the infarcted area to the bottom). The heart tip (50% viable muscle, 50% infarcted zone) was used to collect total RNA. The central section was fixed in formalin and embedded in paraffin. The top section was snap frozen in liquid nitrogen and stored at -80°C for future analysis.

## **RNA isolation, cDNA preparation and quantitative PCR analysis**

Total RNA from tissues and cultured cells isolated from mice was extracted using miRNeasy kit (Qiagen) according to the manufacturer's instructions and quantified with Nanodrop instrument. The quality control was performed with a Agilent 2100 bioanalyzer (Agilent Technologies). Two steps cDNA synthesis was performed with SuperScript II (Invitrogen), and quantification was carried out using QuantStudio 6/7 (Thermofisher). Gene expression was normalized to *Gapdh* and quantified using the  $\Delta\Delta C_t$  method.

Total RNA from human cells was obtained using the Maxwell 16 LEV simplyRNA Purification Kit (Promega) according to manufacturer's instructions, and was quantified with a Nanodrop instrument. Reverse transcription was performed using the high capacity cDNA reverse transcription kit (Applied Biosystems). Real-time PCR for collagen-related genes was performed with a StepOne Plus Real-time PCR system according to the manufacturer's recommendations (Applied Biosystems) using specific TaqMan fluorescent probes. Data were normalized to ribosomal 18S expression. *WISPER* and *WISP2* expression were analyzed with a 7900HT Fast Real-Time PCR system (Applied Biosystems) using the power SYBR green PCR master mix (Applied Biosystems) and specific primers. Gene expression was normalized to *GAPDH*. Primer sequences and fluorescent-labeled TaqMan probes used in mouse and human samples are listed in Table S6.

## **Western blotting**

Proteins were extracted from neonatal CFs transfected with GapmeR-*Wisper* (10 nM) or GapmeR-Scrambled (10 nM) using lysis buffer (50 mM Tris-HCl, 150 mM NaCl, 0.25 % DOC, 1% Nonidet P-40, 1% Triton X-100 containing protease and phosphatase inhibitors (Roche)). Proteins were resuspended in SDS-PAGE buffer, separated on acrylamide gels and transferred to PVDF membranes (BioRad). Membranes were incubated with mouse monoclonal anti- $\alpha$ -SMA primary antibodies (Sigma, 1:2000 dilution), and then with horseradish-conjugated secondary antibodies (Amersham Bioscience, 1:2000 dilution).  $\alpha$ -SMA abundance was quantified by densitometry and normalized to the total amount of proteins.

### **Thymidine incorporation assay**

Adult CFs and lung fibroblasts were transfected with 10 nM of GapmeR-*Wisper* or GapmeR-Scrambled for 24h.  $4 \times 10^3$  cells/well were seeded in 96 round bottom-well plates in quadruplicate. 1  $\mu$ Ci of [ $H^3$ ]-Thymidine was added in each well at 0h, 24h and 48h after cell seeding, and incubated for 18 h at 37°C. Cells were then harvested and transferred into a filter plate. Radioactivity was measured using a scintillation beta-counter (TopCount, Canberra Packard). Measurements were performed in quadruplicate for each condition in 5 independent experiments and normalized to 0 h values.

### **Wound closure assay**

Adult CFs and lung fibroblasts were transfected with 10 nM of GapmeR-*Wisper* or GapmeR-Scrambled for 48h.  $3.5 \times 10^5$  cells were seeded in 3.5-cm well and let them attached overnight. The scratch test was performed using a sterile 10  $\mu$ l filter tip. Medium was replaced twice to remove floating cells. Three pictures for each condition were taken at 20x magnification every 24 hours. The size of the wound has been measured using ImageJ. Measurements were performed in triplicate for each condition in at least 3 independent experiments and normalized to 0 h values (100%).

### **Annexin V-positive cells quantification**

Adult CFs and lung fibroblasts were transfected with 10 nM of GapmeR-*Wisper* or GapmeR-Scrambled. Transfected cells were collected after 48h and resuspended in FACS medium. Cells were stained using the FITC Annexin V Apoptosis detection Kit (BD Pharmingen) according to the manufacturer's instructions. Annexin V and PI signals were quantified with a Galios FACS apparatus within 30 min after staining. Results were analyzed with FlowJo.

### ***Wisper in situ* hybridization**

Infarcted (14 days post-MI) and sham-operated hearts were fixed for 48h in 10% neutral buffered formalin and sections of 4  $\mu$ m were obtained. Sections were de-waxed, dehydrated, air-dried briefly and incubated in 1.3 mg/ml Pepsin/0.1mM HCl solution for 5 min at 37°C. After a brief wash in DEPC MQ, sections were incubated overnight at 42.5°C in 1x hybridization buffer

(ENZO Life sciences,) with either 100 nM *Wisper* DIG labeled probe (Exiqon) or a scrambled control probe. The following day the sections were washed once in 5xSSC and twice in 0.2xSSC at hybridization temperature. Subsequently, sections were blocked in DIG blocking buffer from the DIG Wash and Block Buffer Set (Roche) for 20 min followed by a 45 min-incubation in 1:500 anti-DIG-AP, Fab fragments (Roche). Sections were washed 3x5 min with TBS and incubated 3 min in DIG detection buffer at RT. Alkaline phosphatase signal was detected by using NBT/BCIP tablets (Roche) for 4 hours at 30°C in darkness. Finally, sections were counterstained with fast red (Sigma) briefly washed in MQ, quickly dehydrated through an ethanol gradient and mounted with entellan (EMS). Pictures were taken using a Nikon Stereomicroscope SMZ 25 at different magnifications.

### **BrdU labeling and detection**

Mice were supplied with a solution of 10 mg/ml 5-Bromo-2-deoxyuridine (BrdU; Sigma) supplemented with 1% glucose directly in the drinking water for 7 days. The drinking solution was changed every second day. For BrdU detection, frozen heart tissue sections were fixed in 2% paraformaldehyde (PFA) in PBS for 20 min at room temperature. DNA was fragmented by incubation in 2N HCl at 37°C for 20 min and neutralization in 0.1M Borate buffer, pH 8.5. BrdU detection was performed using rat anti-BrdU antibody (Abcam; 1:100) and Alexa-Fluor 594 conjugated anti-rat antibody (Molecular Probes; 1:250). For BrdU-laminin co-immunostaining, tissue sections were first subjected to immunofluorescence staining to detect protein antigens. Tissue sections were post-fixed with 2% PFA for 10 min at room temperature, and then processed for BrdU detection.



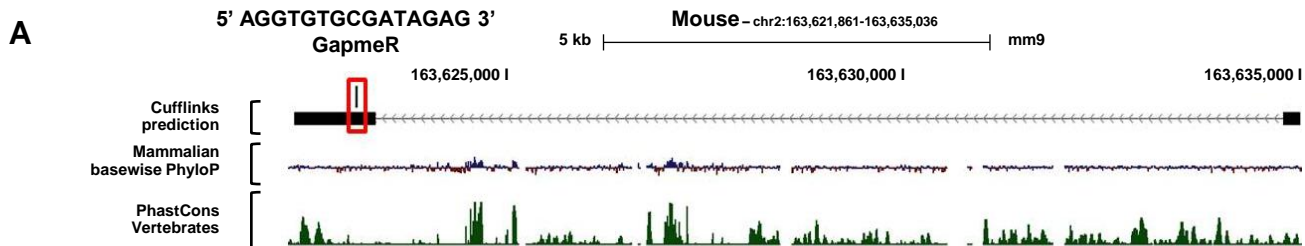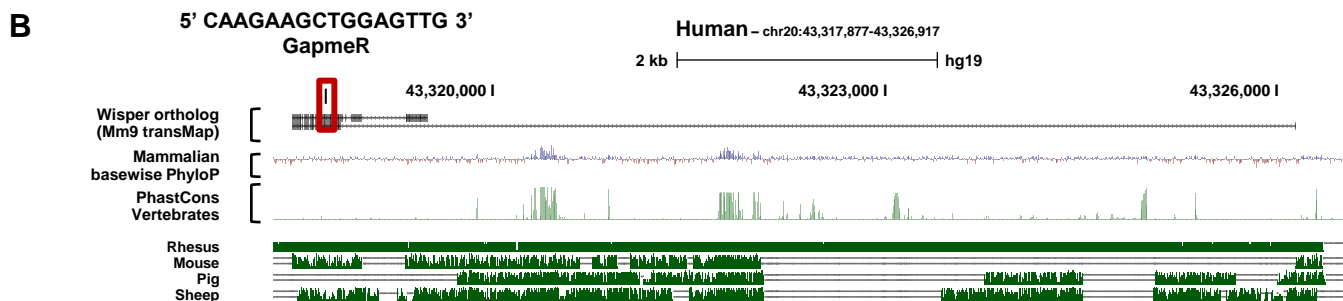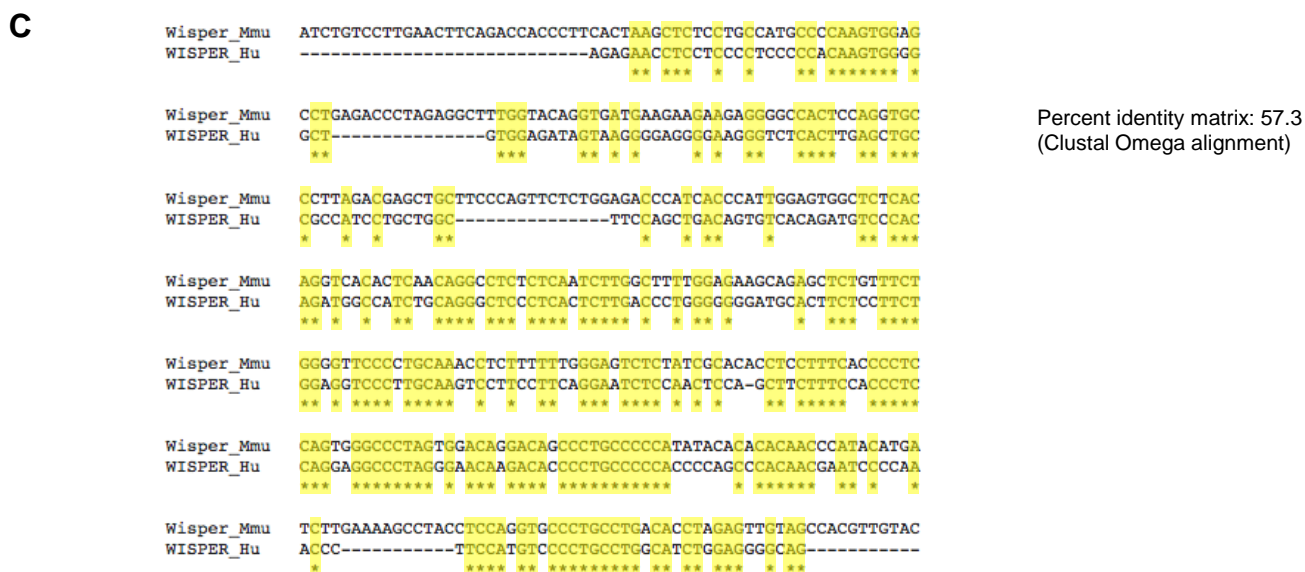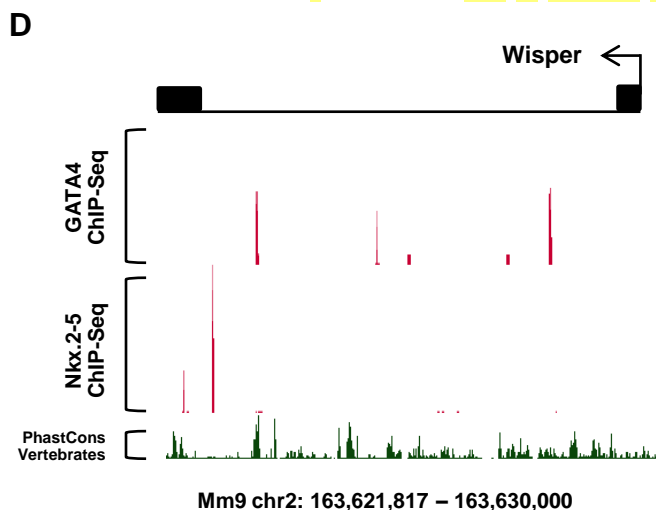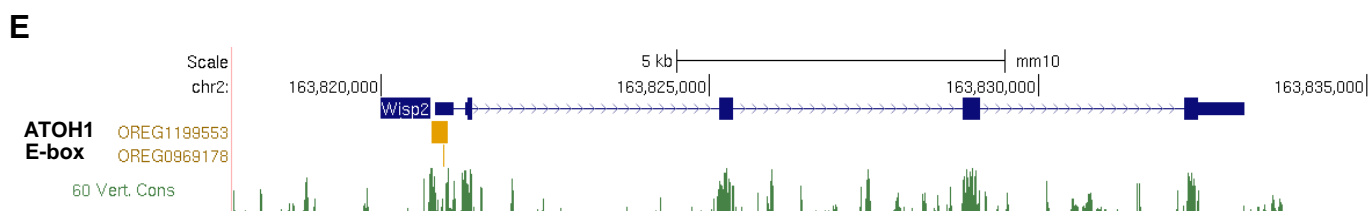

**Figure S1. Conservation between the mouse and human *Wisper* transcripts.** (A and B) UCSC genome browser views of *Wisper* showing the region targeted by GapmeRs and its sequence in the mouse (A) and human genome (B). (C) Pairwise alignment of the murine and human sequence of *Wisper* by Clustal Omega. (D) UCSC Screenshot of GATA4 and NKX2-5 ChIP-Seq data in the adult murine heart at the *Wisper* locus. (E) UCSC Screenshot of the *Wisp2* locus showing ATOH1 binding sites and E-box in the promoter.

**A****MI**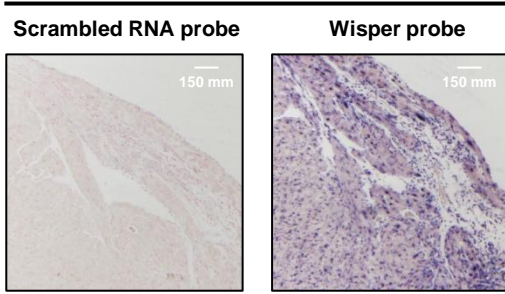**B**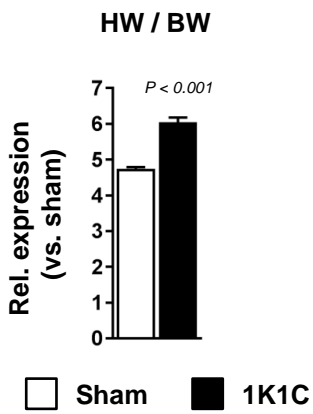**C**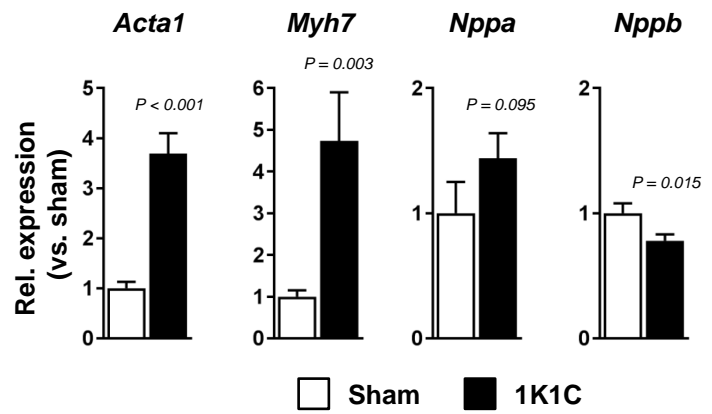**D**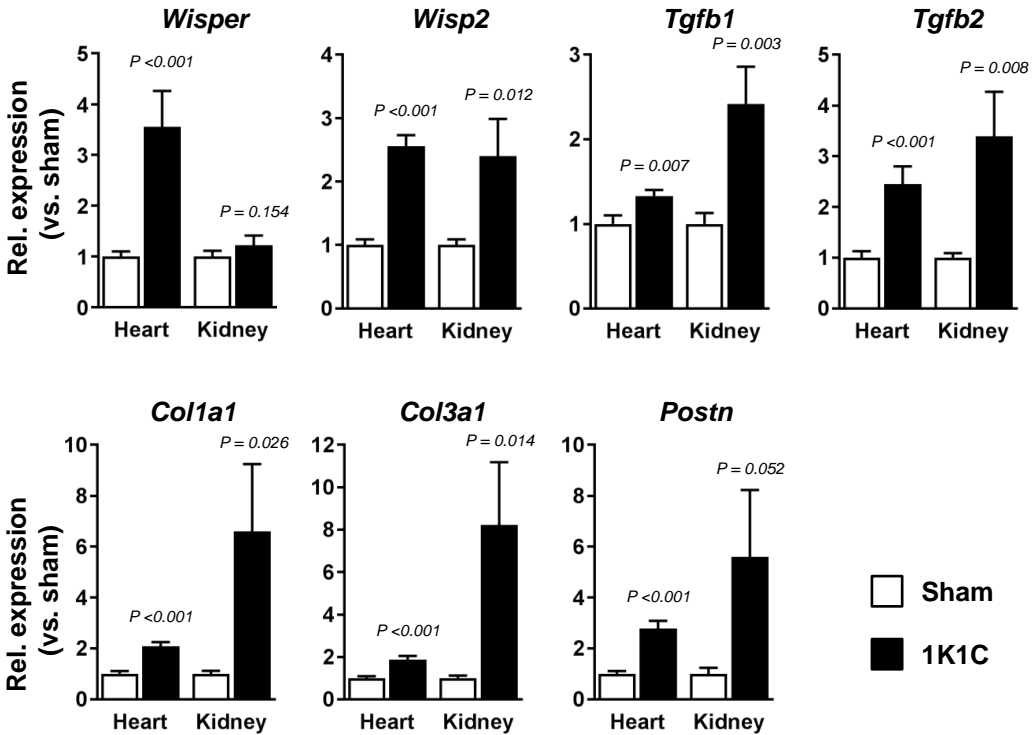

**Figure S2. *Wisper* is expressed in the stressed fibrotic heart but not in the stressed fibrotic kidney.** (A) In situ hybridization on infarcted heart sections: Left panel: scrambled RNA negative control; Right panel: *Wisper* probe (B) Cardiac hypertrophy in mice subjected to the one-kidney one-clip (1K1C) model of renovascular hypertension. 1K1C mice: n=8; Sham-operated mice: n = 7. Heart weight (HW) to tibial length (TL) ratio. Bars represent mean  $\pm$  SEM. *P* values determined by Student's t test. (C) Cardiac stress marker expression measured by qRT-PCR in sham and 1K1C mice 14 days after surgery. Bars represent means normalized to sham  $\pm$  SEM. *P* values determined by Student's t test. (D) *Wisper* and fibrosis-associated gene expression measured by qRT-PCR in sham and 1K1C mice. Bars represent means normalized to sham  $\pm$  SEM. *P* values determined by two-way ANOVA (Fisher's test).

**A**

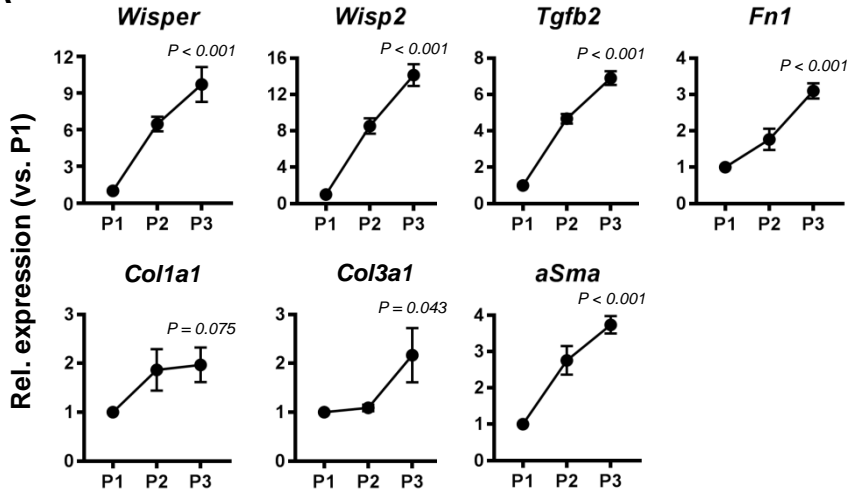

**B**

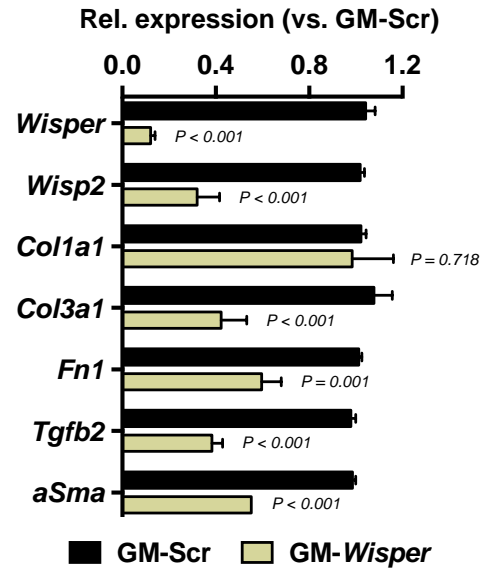

**C**

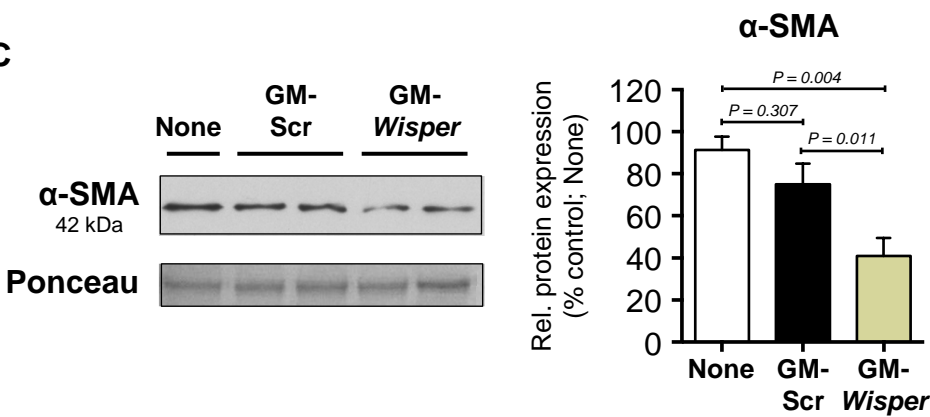

**D**

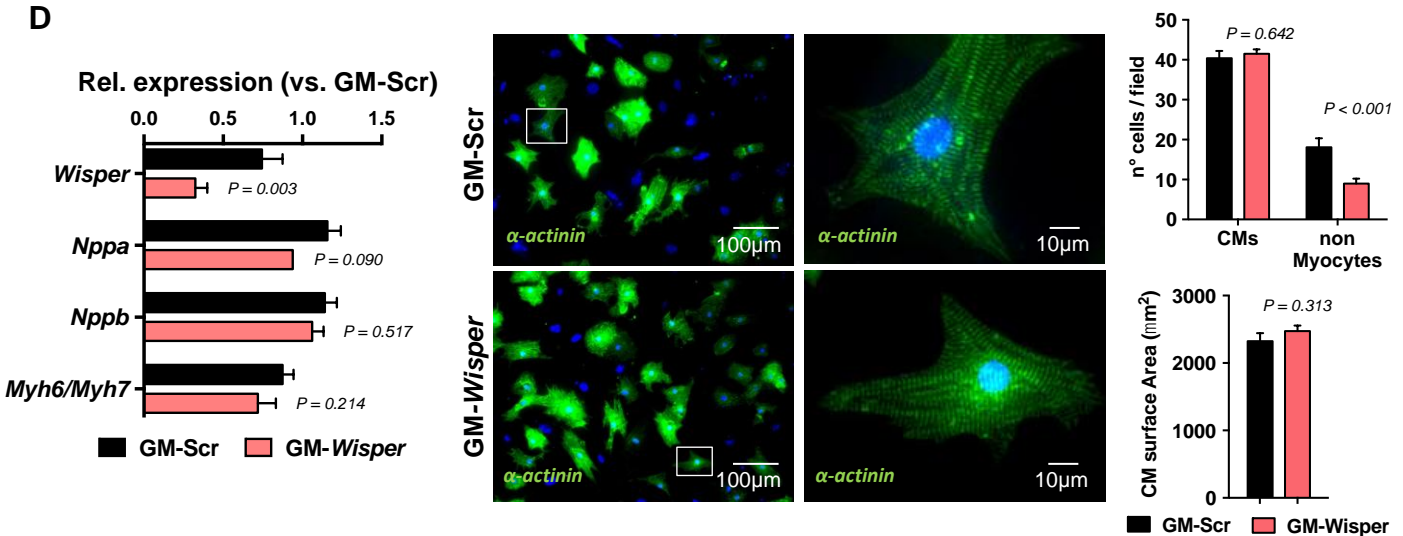

**Figure S3. Effects of *Wisper* knockdown in neonatal CFs and CMs.**

(A) Gene expression measured by qRT-PCR in neonatal cardiac fibroblasts during differentiation into myofibroblasts. (B) PCG expression measured by qRT-PCR in neonatal cardiac fibroblasts after GapmeR-mediated depletion of *Wisper* (10nM; 48h) (n = 4). Bars represent means normalized to GM-Scr  $\pm$  SEM. *P* values determined by two-way ANOVA (Fisher's test). (C)  $\alpha$ -SMA protein quantification by Western blotting in neonatal cardiac fibroblasts. Cells were kept untreated (None) or transfected with scrambled GapmeRs (GM-Scr) or GapmeRs targeting *Wisper* (GM-*Wisper*). Bars represent mean normalized to protein detected by Ponceau staining  $\pm$  SEM (n  $\geq$  5). Graph shows mean normalized to untreated cells. *P* values determined by one-way ANOVA. (D) Left panel: *Wisper* and stress marker expression measured by qRT-PCR upon GapmeR-induced *Wisper* depletion (10nM, 48h; n = 3); Central panel: Immunohistochemistry of GapmeR-treated cardiomyocytes ( $\alpha$ -actinin: green; DAPI: blue). Right panel: Quantification of  $\alpha$ -actinin-positive cardiomyocytes and  $\alpha$ -actinin-negative non-myocytes following GM-*Wisper* transfection. Cardiomyocyte surface area calculated from immunofluorescence images after transfection with GM-Scr or GM-*Wisper* (n = 5). Bars represent means normalized to GM-Scr. *P* values determined by two-way ANOVA (Fisher's test).

A

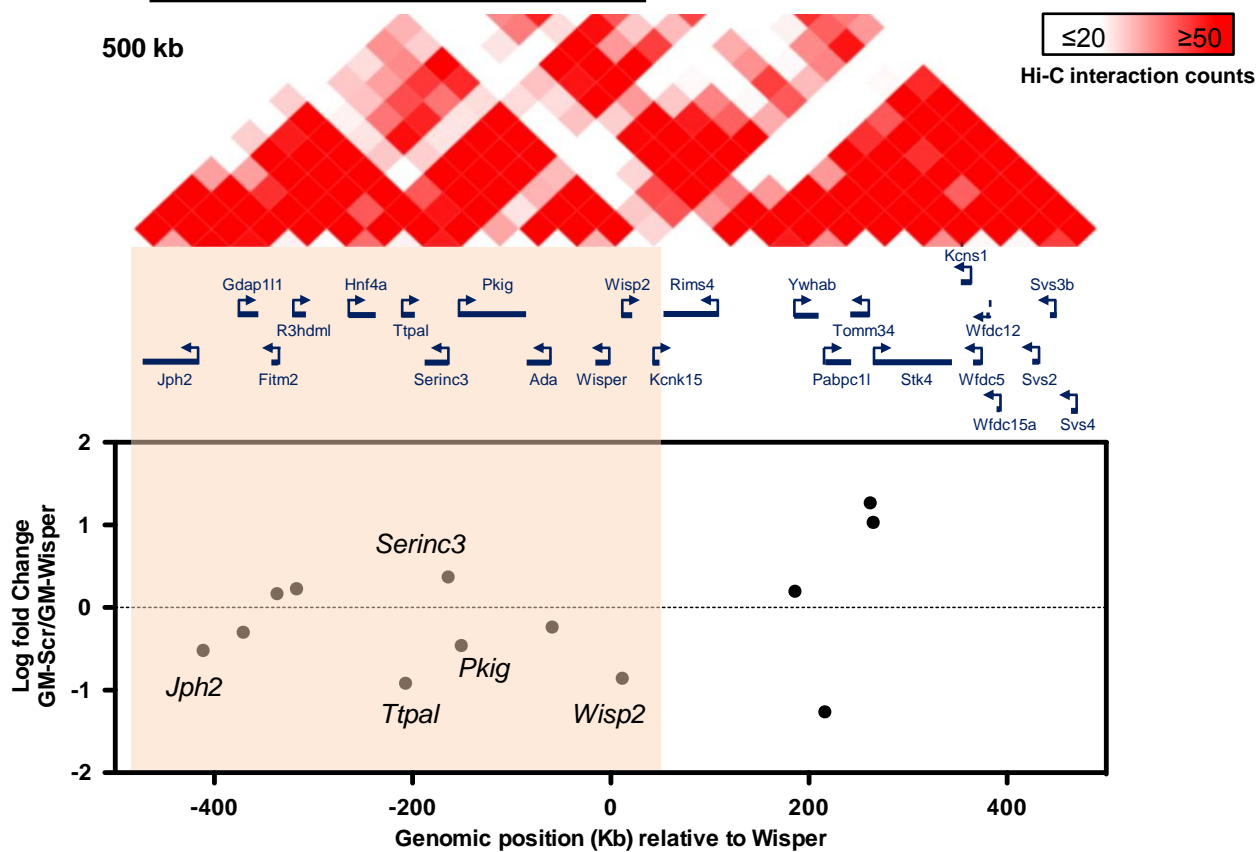

B

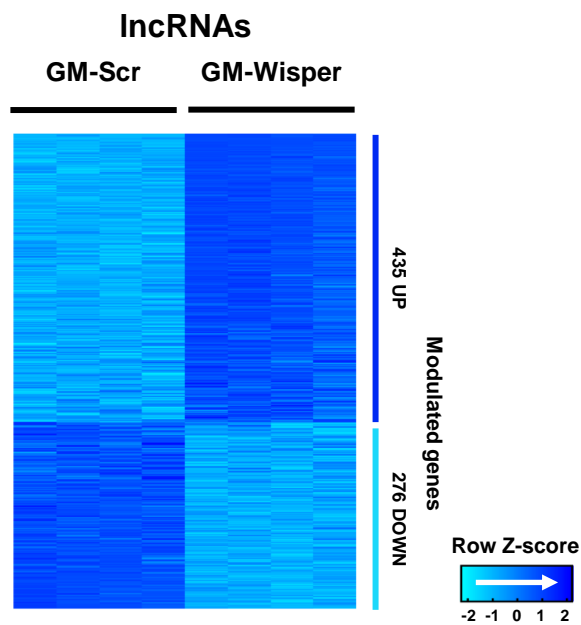

C

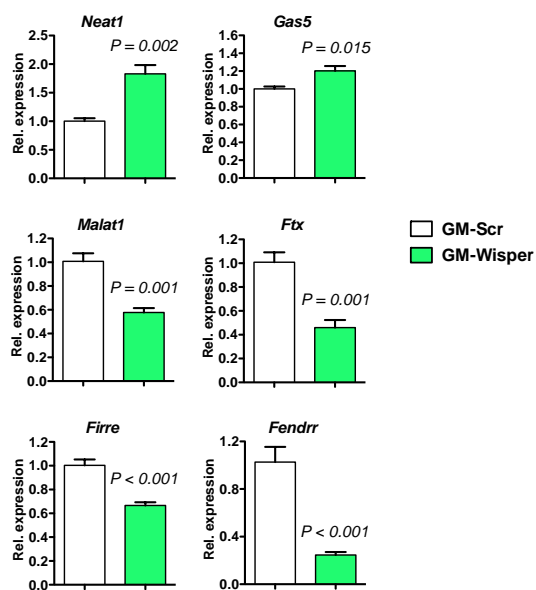

D

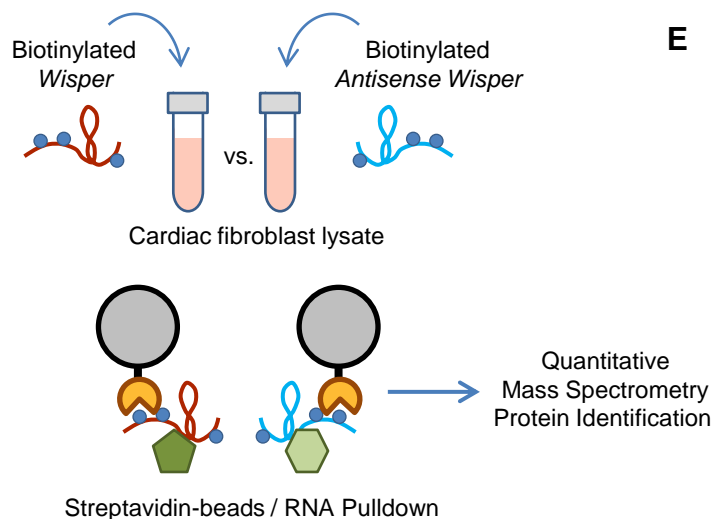

E

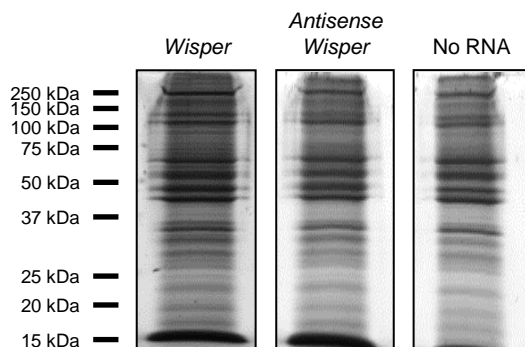

**Figure S4. TAD centered on the murine *Wisper* locus; long noncoding transcriptome after *Wisper* knockdown in fibroblasts; *Wisper* pulldown assay.**

(A) Upper panel: Hi-C interaction density heatmap of a genomic region; Lower panel: Intra-TAD transcriptional changes in gene expression upon *Wisper* depletion in adult cardiac fibroblasts. RNA sequencing data; significantly modulated genes are indicated (n = 4). (B) Hierarchical clustering of lncRNAs differentially expressed in adult CFs following transfection with GM-*Wisper* or GM-Scr assessed by RNA-Seq (fold change >2 and *adjusted P*<0.05). (C) Expression of specific lncRNAs assessed by RNA-Seq in adult cardiac fibroblasts after transfection with GM-*Wisper* or GM-Scr. (D) Schematic of the RNA pulldown assay. (E) Pulldown fractions, reduced by alkylation and digested by trypsin; Coomassie staining.



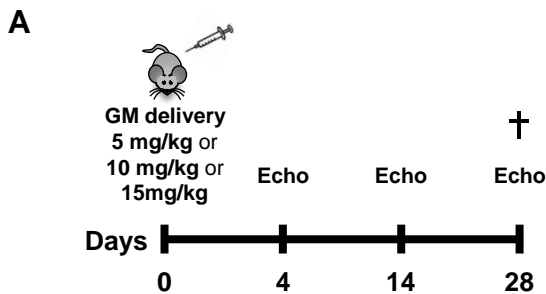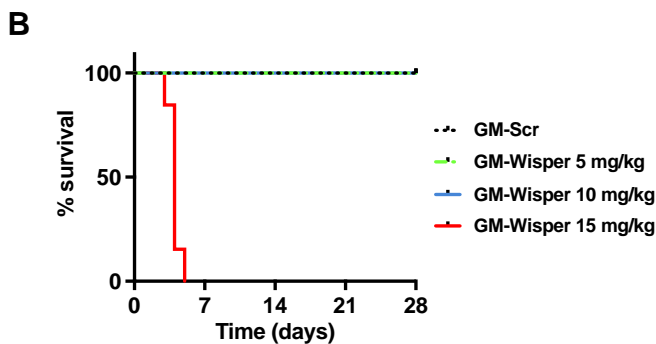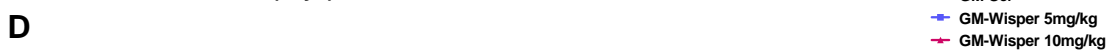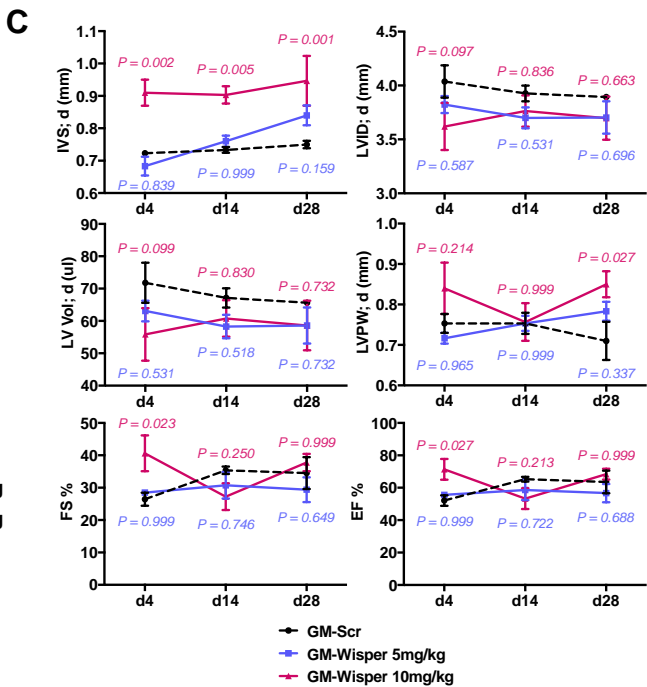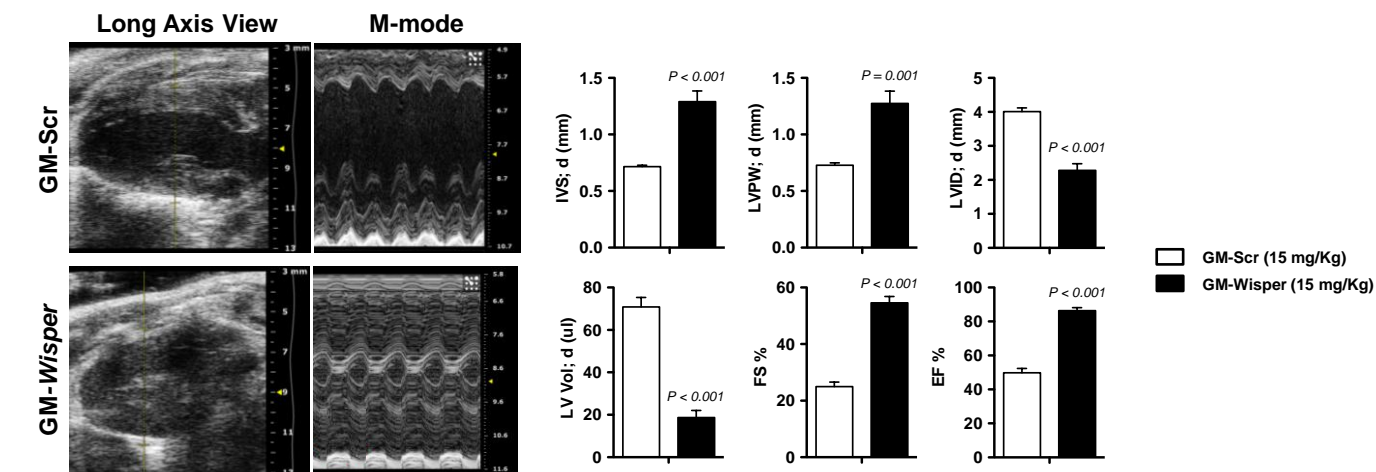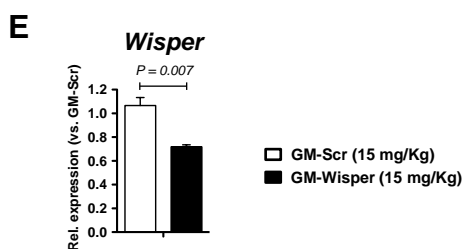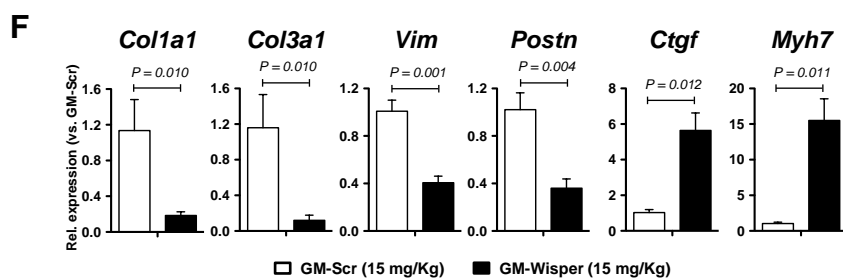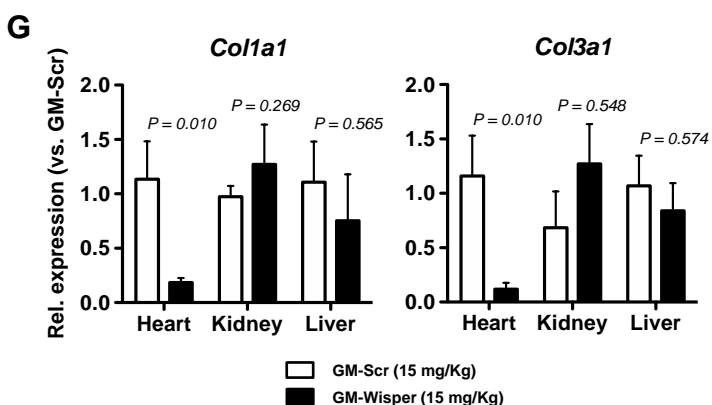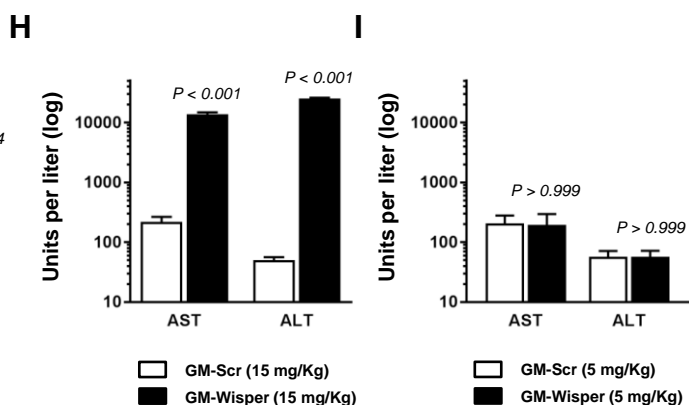

**Figure S5. Dose-response analysis after injection of GapmeRs targeting *Wisper* in vivo.** (A)

Overview of the experimental setup using different doses of GapmeRs targeting *Wisper* (GM-*Wisper*) or scrambled GapmeRs (GM-Scr). (B) Animal survival following GapmeR injection. (C). Echocardiographic parameters following injection of different doses of GM-*Wisper* or GM-Scr. Graphs show means  $\pm$  SEM (n = 3). *P* values calculated by two-way ANOVA (Bonferroni's test). (D) Echocardiographic parameters 4 days after injection of GapmeR (15 mg/kg). Long axis view of control and GM-*Wisper*-injected hearts. Bars represent mean  $\pm$  SEM (n = 5). *P* values vs. GM-Scr determined by Student's *t* test. (E) *Wisper* expression in adult cardiac fibroblasts isolated 2 days after GapmeR injection (15 mg/kg). Bars represent mean  $\pm$  SEM (n = 3). *P* values vs. GM-Scr determined by Student's *t* test. (F) Expression of fibrotic/stress markers measured by qRT-PCR in the heart of mice injected with GapmeRs (15 mg/kg). Bars represent mean  $\pm$  SEM (n = 4). *P* values vs. GM-Scr determined by Student's *t* test. (G) Collagen expression measured in different tissues after GapmeR injection (15 mg/kg). Bars represent mean  $\pm$  SEM (n  $\geq$  3). *P* values vs. GM-Scr determined by two-way ANOVA test. (H and I) Levels of alanine aminotransferase (ALT) and aspartate aminotransferase (AST) measured in the plasma of mice injected with 15 mg/kg (H) or 5 mg/kg GapmeRs (I) GM-Scr: white; GM-*Wisper*: black). Bars represent mean  $\pm$  SEM (GM-Scr, n = 3; GM-*Wisper*, n = 4). *P* values vs. GM-Scr determined by two-way ANOVA test (Bonferroni's test).

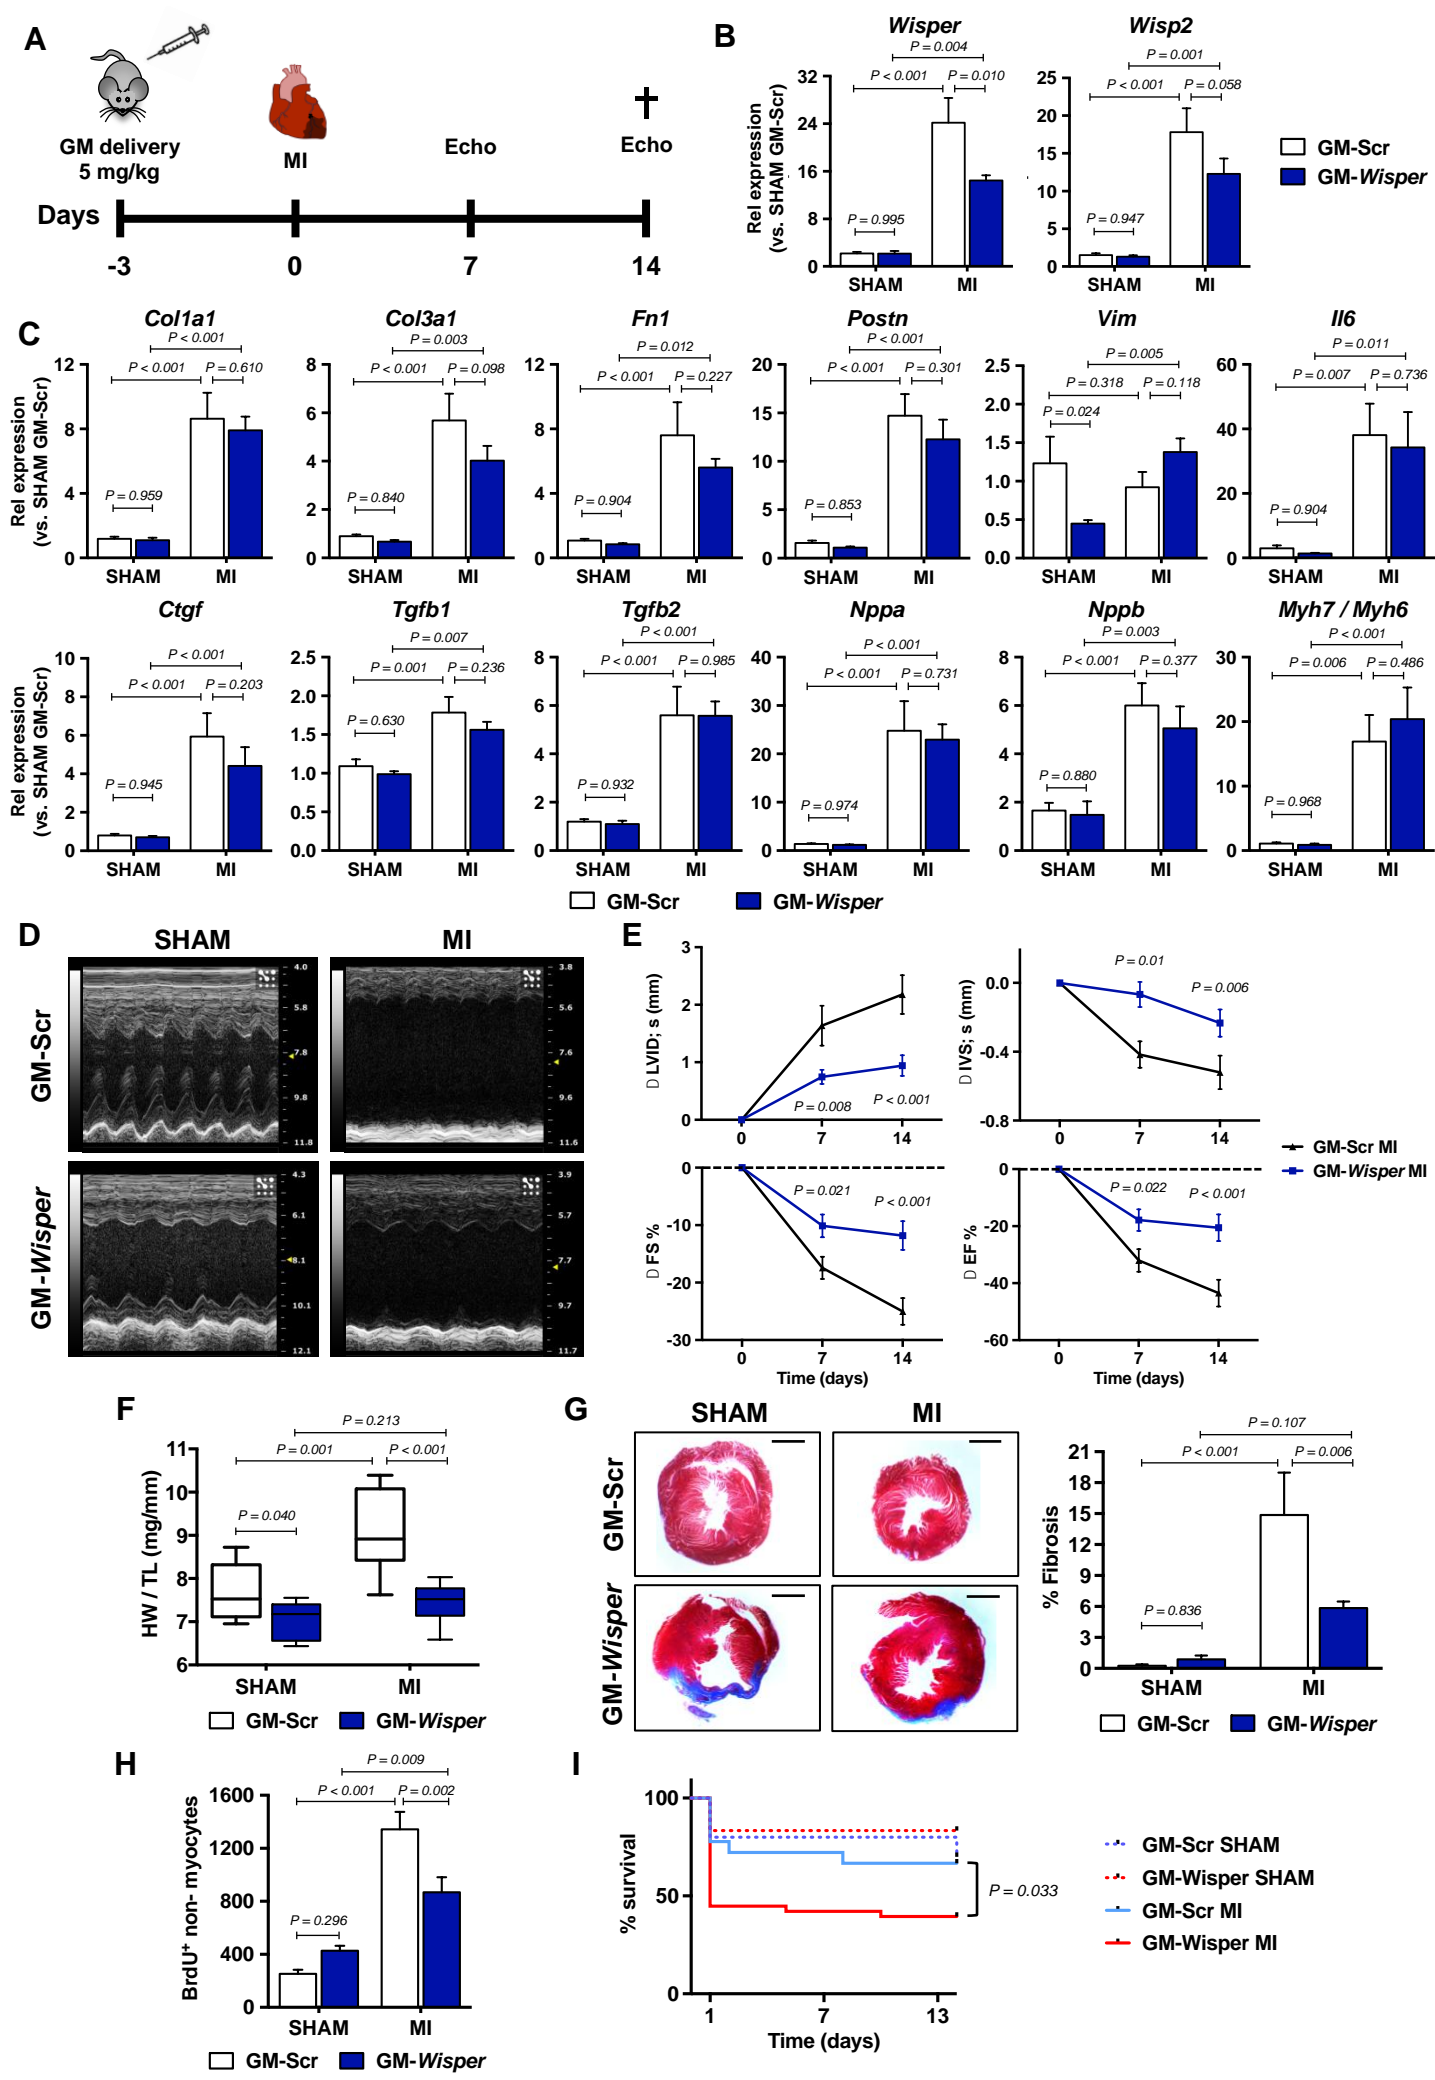

**Figure S6. Preventative *Wisper* depletion inhibits cardiac fibrosis and improves function.** (A) Overview of the experimental setup for the preventative inhibition of *Wisper*. GapmeR targeting *Wisper* (GM-*Wisper*) or scrambled GapmeRs (GM-Scr) were injected 3 days before surgery at a dose of 5 mg/kg. Two weeks thereafter, mice were sacrificed and tissues collected. (B and C) *Wisper* expression (B) and fibrotic/stress PCG expression (C) were measured by qRT-PCR in sham-operated and MI mice. GM-Scr: white; GM-*Wisper*: blue (sham n = 6; MI n = 8) (D) M mode images of the left ventricle of control and GM-*Wisper*-injected hearts. (E) Echocardiographic assessment of cardiac dimension (LVID; IVS) and function (FS%; EF%). Graphs show mean values normalized to the average value of the sham-operated group  $\pm$  SEM. (sham n = 6; MI n = 8) (F) Heart weight (HW) to tibial length (TL) ratio following GapmeR injection (n  $\geq$  6). (G) Quantification of fibrosis by Masson's trichrome staining on transversal ventricle sections. Fibrosis was measured using ImageJ (n = 6). (H) Quantification of BrdU-positive non-myocyte cells after GapmeR injection in sham-operated and MI mice. Mice received BrdU 3 days before GapmeR injection and were analyzed 2 weeks after MI (n = 6). (I) Survival after preventative GapmeR injection. *P* values calculated by Log-rank (Mantel-Cox) test vs. the GM-Scr MI group. In (B), (C) and (G) bars represent means normalized to GM-Scr sham  $\pm$  SEM. In (B), (C), (E), (F), (G) and (H) *P* values were calculated by two-way ANOVA test.

**A**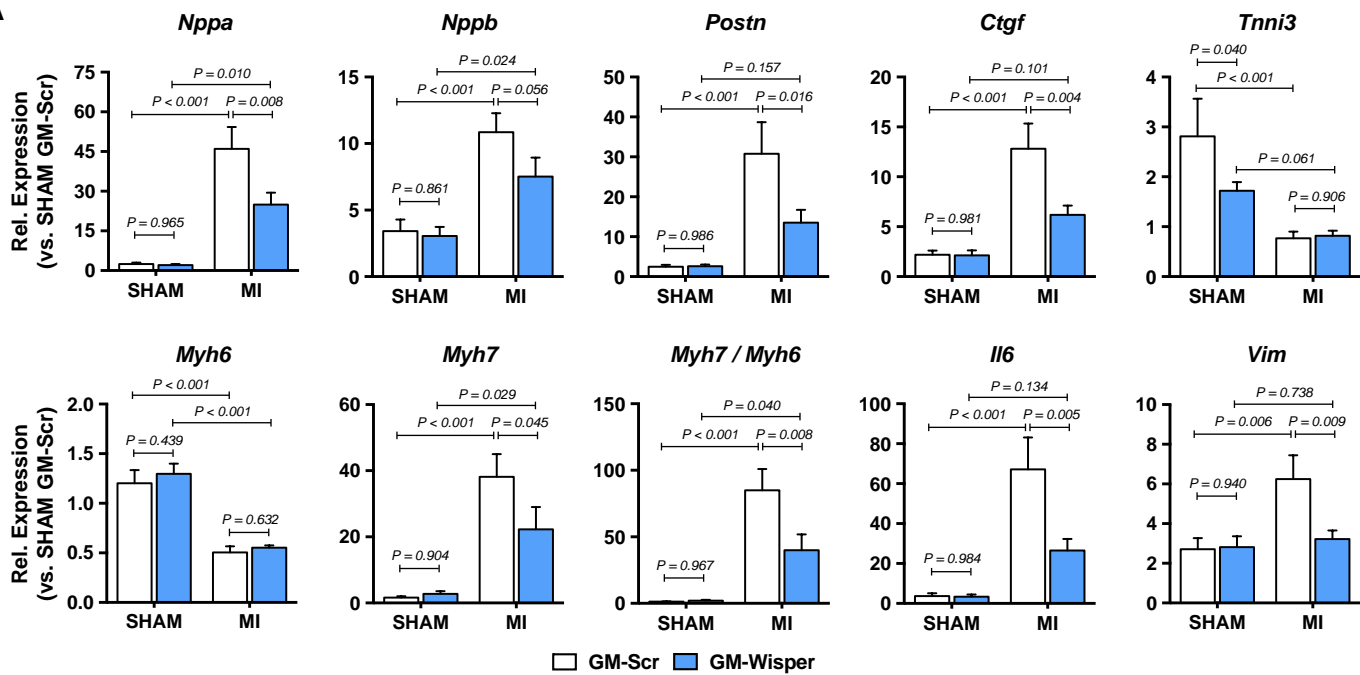**B**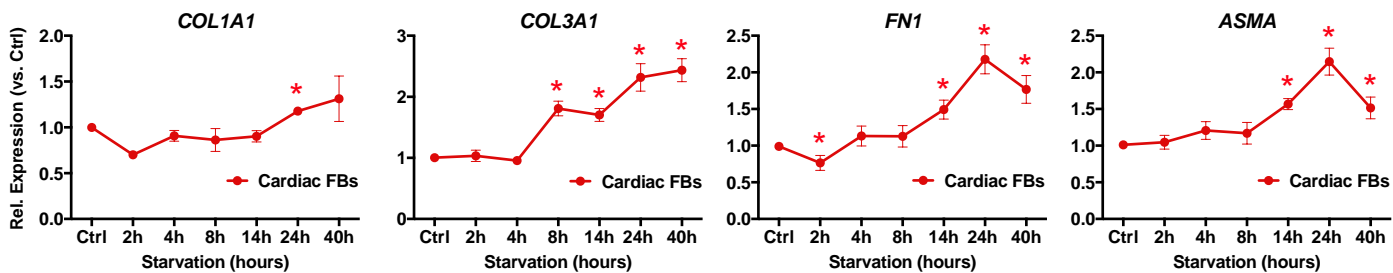**C**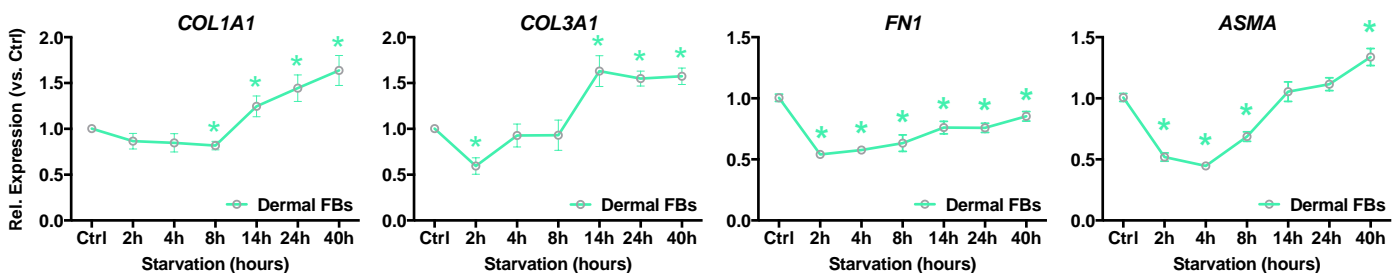

**Figure S7. Expression of cardiac markers of stress after therapeutic depletion of *Wisper* in the infarcted heart; expression of myofibroblast genes in differentiating cardiac and dermal human fibroblasts.** (A) RNA expression level of fibrotic/stress cardiac markers measured by qRT-PCR following injection of GapmeRs targeting *Wisper* (GM-*Wisper*, light blue) or scrambled GapmeRs (GM-Scr, white) in sham-operated and MI mice. Bars represent means normalized to GM-Scr Sham  $\pm$  SEM. *P* values were calculated by two-way ANOVA (Fisher's test). (B and C) Time course of *COL1A1*, *COL3A1*, *FNI* and  *$\alpha$ SMA* expression after induction of differentiation by serum starvation in human cardiac (B) and dermal fibroblasts (C). Graphs show means normalized to control  $\pm$  SEM (n = 6 to 14). *P* values vs. control determined by one-way ANOVA. \*  $P < 0.05$ .

Table S1.

## Echocardiographic parameters measured 1, 7, 14, and 28 days after MI.

|                           | 1d post-MI |          |          |          |             | 7d post-MI |          |          |          |             |
|---------------------------|------------|----------|----------|----------|-------------|------------|----------|----------|----------|-------------|
|                           | Sham (n=8) |          | MI (n=7) |          | Sham vs. MI | Sham (n=7) |          | MI (n=6) |          | Sham vs. MI |
|                           | Mean       | St. Dev. | Mean     | St. Dev. | Pvalue      | Mean       | St. Dev. | Mean     | St. Dev. | Pvalue      |
| Body weight (g)           | 22.743     | 1.858    | 22.746   | 1.340    | 0.997035    | 26.136     | 2.074    | 23.662   | 2.428    | 0.0728147   |
| Heart rate                | 515.595    | 33.521   | 497.674  | 44.375   | 0.389669    | 503.325    | 48.790   | 472.209  | 44.553   | 0.2582581   |
| IVS;d (mm)                | 0.690      | 0.023    | 0.670    | 0.062    | 0.405440    | 0.719      | 0.025    | 0.542    | 0.222    | 0.0582405   |
| IVS;s (mm)                | 1.062      | 0.055    | 0.854    | 0.145    | 0.002338    | 1.050      | 0.107    | 0.624    | 0.281    | 0.0033832   |
| LVID;d (mm)               | 3.596      | 0.261    | 3.963    | 0.384    | 0.047210    | 3.948      | 0.315    | 5.435    | 1.409    | 0.0194847   |
| LVID;s (mm)               | 2.380      | 0.359    | 3.301    | 0.607    | 0.003016    | 2.882      | 0.408    | 4.555    | 1.149    | 0.0048123   |
| LVPW;d (mm)               | 0.669      | 0.018    | 0.667    | 0.126    | 0.957602    | 0.684      | 0.030    | 0.674    | 0.239    | 0.9130412   |
| LVPW;s (mm)               | 1.016      | 0.117    | 0.885    | 0.199    | 0.136539    | 0.957      | 0.076    | 0.821    | 0.217    | 0.1477382   |
| LVID Trace (CO) (ml/min)  | 16.923     | 2.229    | 11.618   | 3.595    | 0.004015    | 17.641     | 2.135    | 11.229   | 3.050    | 0.0009818   |
| LVID Trace (SV) (ul)      | 33.036     | 4.126    | 23.789   | 7.454    | 0.009697    | 36.457     | 5.790    | 23.438   | 6.085    | 0.0022759   |
| %FS                       | 34.106     | 5.977    | 17.238   | 8.188    | 0.000497    | 27.356     | 5.588    | 8.732    | 4.875    | 0.0000548   |
| %EF                       | 63.516     | 8.330    | 35.687   | 15.130   | 0.000601    | 53.362     | 8.604    | 18.944   | 10.072   | 0.0000360   |
| deltaFS%                  | n.m.       | n.m.     | -16.868  | 8.188    | 0.000497    | n.m.       | n.m.     | -18.624  | 4.875    | 0.0000548   |
| deltaEF%                  | n.m.       | n.m.     | -27.830  | 15.130   | 0.000601    | n.m.       | n.m.     | -34.417  | 10.072   | 0.0000360   |
| LV Mass (mg)              | 79.770     | 9.788    | 90.712   | 15.384   | 0.119376    | 97.692     | 11.324   | 142.142  | 67.594   | 0.1125914   |
| LV Vol;d (ul)             | 54.970     | 9.292    | 69.292   | 15.217   | 0.043631    | 70.591     | 11.801   | 152.439  | 88.564   | 0.0329385   |
| LV Vol;s (ul)             | 20.295     | 6.771    | 46.491   | 19.503   | 0.003378    | 33.585     | 9.774    | 129.475  | 85.078   | 0.0124903   |
| LA MI trace (mm)          | 0.000      | 0.000    | 5.549    | 2.094    | 4.266E-06   | 0.000      | 0.000    | 7.025    | 1.474    | 6.431E-08   |
| SA MI trace (mm)          | 0.000      | 0.000    | 3.621    | 1.331    | 3.221E-06   | 0.000      | 0.000    | 5.851    | 1.073    | 1.591E-08   |
| LV diastole area LA (mm2) | 17.880     | 1.643    | 22.849   | 2.737    | 8.132E-04   | 22.390     | 1.831    | 32.374   | 12.810   | 6.646E-02   |
| LV systole area LA (mm2)  | 11.467     | 2.432    | 18.960   | 3.748    | 4.494E-04   | 15.584     | 2.247    | 28.318   | 12.468   | 2.174E-02   |
| LV diastole area SA (mm2) | 8.176      | 1.829    | 11.096   | 3.275    | 4.901E-02   | 11.121     | 1.705    | 23.541   | 12.332   | 2.240E-02   |
| LV systole area SA (mm2)  | 3.772      | 1.908    | 8.151    | 3.528    | 9.334E-03   | 6.555      | 1.432    | 20.173   | 11.313   | 8.778E-03   |
| % area shortening LA      | 36.349     | 9.605    | 17.708   | 7.323    | 1.089E-03   | 30.530     | 6.606    | 13.797   | 6.109    | 6.390E-04   |
| % area shortening SA      | 55.513     | 14.044   | 29.019   | 14.858   | 3.566E-03   | 41.386     | 6.790    | 15.431   | 7.732    | 4.745E-05   |
| LV mass/BW echo           | 3.511      | 0.368    | 3.973    | 0.501    | 6.103E-02   | 3.733      | 0.287    | 6.250    | 3.619    | 9.176E-02   |

  

|                           | 14d post-MI |          |          |          |             | 28d post-MI |          |           |          |             |
|---------------------------|-------------|----------|----------|----------|-------------|-------------|----------|-----------|----------|-------------|
|                           | Sham (n=7)  |          | MI (n=8) |          | Sham vs. MI | Sham (n=6)  |          | MI (n=10) |          | Sham vs. MI |
|                           | Mean        | St. Dev. | Mean     | St. Dev. | Pvalue      | Mean        | St. Dev. | Mean      | St. Dev. | Pvalue      |
| Body weight (g)           | 28.131      | 1.262    | 28.488   | 1.462    | 0.6247692   | 28.182      | 28.182   | 28.918    | 1.986    | 0.4322619   |
| Heart rate                | 539.247     | 36.690   | 516.350  | 91.303   | 0.5466856   | 579.005     | 579.005  | 531.402   | 43.156   | 0.0619227   |
| IVS;d (mm)                | 0.761       | 0.087    | 0.550    | 0.223    | 0.0349765   | 0.821       | 0.821    | 0.493     | 0.112    | 0.0001187   |
| IVS;s (mm)                | 1.127       | 0.143    | 0.590    | 0.276    | 0.0004796   | 1.276       | 1.276    | 0.572     | 0.190    | 4.590E-06   |
| LVID;d (mm)               | 3.805       | 0.153    | 5.147    | 0.740    | 0.0004233   | 3.761       | 3.761    | 5.654     | 0.678    | 1.373E-05   |
| LVID;s (mm)               | 2.480       | 0.250    | 4.669    | 0.953    | 0.0000546   | 2.236       | 2.236    | 5.200     | 0.795    | 8.177E-07   |
| LVPW;d (mm)               | 0.758       | 0.073    | 0.574    | 0.329    | 0.1725612   | 0.747       | 0.747    | 0.684     | 0.333    | 0.657863    |
| LVPW;s (mm)               | 1.208       | 0.092    | 0.726    | 0.468    | 0.0191913   | 1.217       | 1.217    | 0.878     | 0.432    | 0.091369    |
| LVID Trace (CO) (ml/min)  | 22.247      | 2.935    | 12.709   | 5.822    | 0.0017940   | 24.503      | 24.503   | 13.956    | 5.536    | 0.002321    |
| LVID Trace (SV) (ul)      | 40.261      | 5.624    | 25.976   | 12.946   | 0.0183477   | 43.668      | 43.668   | 27.762    | 11.813   | 0.010867    |
| %FS                       | 34.874      | 5.177    | 9.851    | 6.566    | 0.0000019   | 40.876      | 40.876   | 8.292     | 4.229    | 4.513E-08   |
| %EF                       | 64.472      | 6.787    | 20.986   | 13.355   | 0.0000031   | 71.605      | 71.605   | 17.922    | 8.692    | 2.388E-08   |
| deltaFS%                  | n.m.        | n.m.     | -25.022  | 6.566    | 0.0000019   | n.m.        | n.m.     | -32.584   | 4.229    | 4.513E-08   |
| deltaEF%                  | n.m.        | n.m.     | -43.486  | 13.355   | 0.0000031   | n.m.        | n.m.     | -53.684   | 8.692    | 2.388E-08   |
| LV Mass (mg)              | 101.447     | 14.863   | 110.968  | 29.555   | 0.4556725   | 101.666     | 101.666  | 140.861   | 36.660   | 0.023029    |
| LV Vol;d (ul)             | 62.340      | 5.938    | 129.795  | 44.157   | 0.0015362   | 60.843      | 60.843   | 159.988   | 44.528   | 0.000109    |
| LV Vol;s (ul)             | 22.280      | 5.579    | 106.225  | 51.287   | 0.0008826   | 17.840      | 17.840   | 133.449   | 47.820   | 4.708E-05   |
| LA MI trace (mm)          | 0.000       | 0.000    | 8.209    | 2.193    | 2.131E-07   | 0.000       | 0.000    | 9.751     | 1.791    | 2.877E-09   |
| SA MI trace (mm)          | 0.000       | 0.000    | 4.693    | 3.066    | 1.429E-03   | 0.000       | 0.000    | 7.240     | 2.249    | 1.903E-06   |
| LV diastole area LA (mm2) | 23.364      | 2.443    | 32.889   | 5.216    | 7.031E-04   | 22.433      | 2.245    | 37.881    | 5.414    | 1.220E-05   |
| LV systole area LA (mm2)  | 16.292      | 3.380    | 28.243   | 5.720    | 3.309E-04   | 12.623      | 3.409    | 33.223    | 5.208    | 5.958E-07   |
| LV diastole area SA (mm2) | 10.074      | 0.825    | 18.695   | 7.457    | 9.690E-03   | 10.175      | 2.120    | 24.106    | 6.017    | 9.219E-05   |
| LV systole area SA (mm2)  | 3.609       | 0.775    | 15.810   | 7.562    | 9.839E-04   | 3.374       | 1.078    | 20.771    | 5.954    | 6.304E-06   |
| % area shortening LA      | 30.651      | 9.572    | 14.569   | 5.412    | 1.306E-03   | 43.964      | 11.863   | 12.302    | 4.206    | 1.810E-06   |
| % area shortening SA      | 64.268      | 6.042    | 17.862   | 10.971   | 1.969E-07   | 67.314      | 5.571    | 14.595    | 4.384    | 5.243E-12   |
| LV mass/BW echo           | 3.612       | 0.538    | 3.889    | 0.971    | 5.146E-01   | 3.620       | 0.393    | 4.938     | 1.507    | 5.708E-02   |

n.m. = not measurable

**Table S2. Echocardiographic parameters measured 4, 14, and 28 in untouched mice injected with 5, 10, or 15 mg/kg of GM-Scrambled (control) or GM-Wisper (Wisper).**

|                              |          | day 4   |          |                         |                          |  |
|------------------------------|----------|---------|----------|-------------------------|--------------------------|--|
| Gapmer against concentration | Control  | Wisper  | Wisper   | Ctrl / Wisper<br>5mg/kg | Ctrl / Wisper<br>10mg/kg |  |
|                              | 15 mg/kg | 5 mg/kg | 10 mg/kg |                         |                          |  |
|                              | n=       | n=3     | n=3      | n=3                     | p value                  |  |
| Body weight (g)              | 28.097   | 25.287  | 26.097   | 0.1236                  | 0.2005                   |  |
| Heart rate (Beats/min)       | 516.874  | 432.807 | 458.521  | 0.2223                  | 0.4654                   |  |
| IVS;d (mm)                   | 0.720    | 0.680   | 0.914    | 0.2328                  | 0.0083                   |  |
| IVS;s (mm)                   | 1.162    | 1.059   | 1.450    | 0.3532                  | 0.2439                   |  |
| LVID;d (mm)                  | 4.036    | 3.826   | 3.620    | 0.2814                  | 0.1915                   |  |
| LVID;s (mm)                  | 2.969    | 2.736   | 2.160    | 0.1578                  | 0.0635                   |  |
| LVPW;d (mm)                  | 0.752    | 0.715   | 0.838    | 0.2428                  | 0.2757                   |  |
| LVPW;s(mm)                   | 0.974    | 0.957   | 1.263    | 0.8463                  | 0.2009                   |  |
| % FS                         | 26.431   | 28.489  | 40.616   | 0.3834                  | 0.0730                   |  |
| %EF                          | 52.091   | 55.613  | 71.410   | 0.3509                  | 0.0545                   |  |
| LV Mass (mg)                 | 106.971  | 91.905  | 108.271  | 0.1403                  | 0.9076                   |  |
| LV Vol;d (µl)                | 71.813   | 63.086  | 55.849   | 0.2800                  | 0.1939                   |  |
| LV Vol;s (µl)                | 34.384   | 27.992  | 16.533   | 0.1502                  | 0.0536                   |  |

  

|                              |          | day 14  |          |                         |                          |  |
|------------------------------|----------|---------|----------|-------------------------|--------------------------|--|
| Gapmer against concentration | Control  | Wisper  | Wisper   | Ctrl / Wisper<br>5mg/kg | Ctrl / Wisper<br>10mg/kg |  |
|                              | 15 mg/kg | 5 mg/kg | 10 mg/kg |                         |                          |  |
|                              | n=       | n=3     | n=3      | n=3                     | p value                  |  |
| Body weight (g)              | 28.937   | 26.310  | 25.767   | 0.1165                  | 0.0765                   |  |
| Heart rate (Beats/min)       | 570.370  | 505.002 | 469.117  | 0.3395                  | 0.0274                   |  |
| IVS;d (mm)                   | 0.734    | 0.761   | 0.905    | 0.2451                  | 0.0053                   |  |
| IVS;s (mm)                   | 1.236    | 1.096   | 1.254    | 0.1415                  | 0.9206                   |  |
| LVID;d (mm)                  | 3.926    | 3.700   | 3.762    | 0.1393                  | 0.3696                   |  |
| LVID;s (mm)                  | 2.536    | 2.570   | 2.748    | 0.8814                  | 0.4436                   |  |
| LVPW;d (mm)                  | 0.752    | 0.756   | 0.754    | 0.9021                  | 0.9728                   |  |
| LVPW;s(mm)                   | 1.219    | 1.046   | 1.042    | 0.1786                  | 0.2570                   |  |
| % FS                         | 35.365   | 30.734  | 27.215   | 0.3374                  | 0.1299                   |  |
| %EF                          | 65.291   | 58.650  | 53.263   | 0.3594                  | 0.1419                   |  |
| LV Mass (mg)                 | 101.650  | 96.684  | 110.851  | 0.3877                  | 0.1690                   |  |
| LV Vol;d (µl)                | 67.127   | 58.276  | 60.792   | 0.1313                  | 0.3770                   |  |
| LV Vol;s (µl)                | 23.230   | 24.520  | 29.027   | 0.8136                  | 0.4153                   |  |

  

|                              |          | day 28  |          |                         |                          |  |
|------------------------------|----------|---------|----------|-------------------------|--------------------------|--|
| Gapmer against concentration | Control  | Wisper  | Wisper   | Ctrl / Wisper<br>5mg/kg | Ctrl / Wisper<br>10mg/kg |  |
|                              | 15 mg/kg | 5 mg/kg | 10 mg/kg |                         |                          |  |
|                              | n=       | n=3     | n=3      | n=3                     | p value                  |  |
| Body weight (g)              | 30.060   | 27.393  | 28.447   | 0.1405                  | 0.3453                   |  |
| Heart rate (Beats/min)       | 548.942  | 532.581 | 548.942  | 0.0891                  | 1.0000                   |  |
| IVS;d (mm)                   | 0.749    | 0.840   | 0.947    | 0.0458                  | 0.0337                   |  |
| IVS;s (mm)                   | 1.237    | 1.245   | 1.384    | 0.9299                  | 0.2329                   |  |
| LVID;d (mm)                  | 3.892    | 3.704   | 3.697    | 0.2782                  | 0.3837                   |  |
| LVID;s (mm)                  | 2.547    | 2.624   | 2.308    | 0.8024                  | 0.4383                   |  |
| LVPW;d (mm)                  | 0.712    | 0.783   | 0.849    | 0.2475                  | 0.0780                   |  |
| LVPW;s(mm)                   | 1.135    | 1.043   | 1.204    | 0.6457                  | 0.7340                   |  |
| % FS                         | 34.529   | 29.395  | 37.761   | 0.4551                  | 0.5936                   |  |
| %EF                          | 63.575   | 56.688  | 68.383   | 0.4843                  | 0.5663                   |  |
| LV Mass (mg)                 | 100.092  | 105.254 | 119.919  | 0.6485                  | 0.4324                   |  |
| LV Vol;d (µl)                | 65.634   | 58.593  | 58.592   | 0.2817                  | 0.4138                   |  |
| LV Vol;s (µl)                | 23.821   | 25.849  | 18.876   | 0.7758                  | 0.4599                   |  |



Table S3.

**Echocardiographic parameters measured 7 and 14 days after MI  
in mice injected with GapmeRs 3 days before MI.**

| Gapmer injected PRE MI - Echo 7 days post-MI |                    |                      |                  |                    |                            |                        |                            |                        |
|----------------------------------------------|--------------------|----------------------|------------------|--------------------|----------------------------|------------------------|----------------------------|------------------------|
|                                              | (n=8)<br>CTRL sham | (n=8)<br>WISPER sham | (n=8)<br>CTRL mi | (n=8)<br>WISPER mi | CTRL sham /<br>WISPER sham | CTRL sham /<br>CTRL mi | WISPER sham /<br>WISPER mi | CTRL mi /<br>WISPER mi |
|                                              | Average            |                      |                  |                    | p value                    |                        |                            |                        |
| Body weight (g)                              | 27.449             | 27.566               | 27.403           | 26.633             | 0.88927                    | 0.91670                | 0.24134                    | 0.32804                |
| Heart rate                                   | 491.863            | 464.644              | 465.295          | 482.723            | 0.10584                    | 0.38772                | 0.45453                    | 0.65074                |
| IVS;d (mm)                                   | 0.767              | 0.735                | 0.625            | 0.764              | 0.43587                    | 0.07859                | 0.67218                    | 0.15433                |
| IVS;s (mm)                                   | 1.120              | 1.008                | 0.683            | 0.941              | 0.10777                    | 0.00031                | 0.41082                    | 0.02824                |
| LVID;d (mm)                                  | 3.992              | 3.926                | 5.012            | 4.292              | 0.64335                    | 0.00387                | 0.00567                    | 0.02871                |
| LVID;s (mm)                                  | 2.906              | 2.850                | 4.551            | 3.597              | 0.67579                    | 0.00049                | 0.00039                    | 0.02121                |
| LVPW;d (mm)                                  | 0.734              | 0.713                | 0.601            | 0.777              | 0.66626                    | 0.22839                | 0.10985                    | 0.10543                |
| LVPW;s (mm)                                  | 1.050              | 0.981                | 0.756            | 0.987              | 0.35265                    | 0.02654                | 0.92179                    | 0.06904                |
| Cardiac Output (ml/min)                      | 18.859             | 17.442               | 11.009           | 13.608             | 0.67049                    | 0.00302                | 0.08332                    | 0.20967                |
| Stroke volume (µl)                           | 38.583             | 36.678               | 24.154           | 28.770             | 0.71521                    | 0.00160                | 0.06978                    | 0.25299                |
| %FS                                          | 27.292             | 27.483               | 9.854            | 16.286             | 0.81948                    | 0.00001                | 0.00091                    | 0.03584                |
| %EF                                          | 53.285             | 53.668               | 21.248           | 34.069             | 0.81099                    | 0.00002                | 0.00094                    | 0.03498                |
| LV Mass (mg)                                 | 106.831            | 99.125               | 119.258          | 125.232            | 0.46499                    | 0.19519                | 0.00459                    | 0.60099                |
| LV Vol;d (ul)                                | 70.061             | 67.312               | 122.801          | 83.017             | 0.64407                    | 0.00671                | 0.00608                    | 0.03211                |
| LV Vol;s (ul)                                | 33.006             | 31.402               | 100.587          | 55.072             | 0.66378                    | 0.00213                | 0.00053                    | 0.02611                |
| LA MI trace (mm)                             | 0.000              | 0.000                | 8.805            | 5.521              | 0.00000                    | 0.00000                | 0.00000                    | 0.00935                |
| LA LV lenght (mm)                            | 18.089             | 17.668               | 19.588           | 19.109             | 0.71454                    | 0.02712                | 0.01924                    | 0.48950                |
| SA MI trace (mm)                             | 0.000              | 0.000                | 4.864            | 3.607              | 0.00000                    | 0.00133                | 0.00001                    | 0.36288                |
| SA LV lenght (mm)                            | 11.923             | 12.251               | 15.741           | 13.671             | 0.42011                    | 0.00341                | 0.00170                    | 0.07667                |
| LV diastole area LA (mm <sup>2</sup> )       | 25.048             | 23.979               | 32.868           | 28.196             | 0.62910                    | 0.00315                | 0.00467                    | 0.06080                |
| LV systole area LA (mm <sup>2</sup> )        | 17.292             | 17.381               | 28.071           | 22.329             | 0.84085                    | 0.00100                | 0.00013                    | 0.04222                |
| LV diastole area SA (mm <sup>2</sup> )       | 11.208             | 11.746               | 19.767           | 14.389             | 0.47824                    | 0.00570                | 0.00276                    | 0.05989                |
| LV systole area SA (mm <sup>2</sup> )        | 5.365              | 7.123                | 16.862           | 11.793             | 0.07439                    | 0.00103                | 0.00023                    | 0.09030                |
| Fractional Area Change LA (%)                | 31.242             | 27.100               | 15.351           | 20.645             | 0.34135                    | 0.00074                | 0.07775                    | 0.14931                |
| Fractional Area Change SA (%)                | 51.815             | 39.673               | 17.059           | 18.212             | 0.09316                    | 0.00008                | 0.00092                    | 0.82199                |
| % MI length LA                               | 0.000              | 0.000                | 44.574           | 28.828             | 0.00000                    | 0.00000                | 0.00000                    | 0.00635                |
| % MI length SA                               | 0.000              | 0.000                | 28.525           | 26.268             | 0.00000                    | 0.00037                | 0.00001                    | 0.75902                |
| LVmass/BW                                    | 3.887              | 3.594                | 4.360            | 4.695              | 0.37038                    | 0.18040                | 0.00037                    | 0.41920                |

| Gapmer injected PRE MI - Echo 14 days post-MI |                    |                      |                  |                    |                            |                        |                            |                        |
|-----------------------------------------------|--------------------|----------------------|------------------|--------------------|----------------------------|------------------------|----------------------------|------------------------|
|                                               | (n=8)<br>CTRL sham | (n=8)<br>WISPER sham | (n=8)<br>CTRL mi | (n=8)<br>WISPER mi | CTRL sham /<br>WISPER sham | CTRL sham /<br>CTRL mi | WISPER sham /<br>WISPER mi | CTRL mi /<br>WISPER mi |
|                                               | Average            |                      |                  |                    | p value                    |                        |                            |                        |
| Body weight (g)                               | 28.131             | 28.676               | 28.488           | 27.620             | 0.31082                    | 0.49145                | 0.09819                    | 0.19640                |
| Heart rate                                    | 539.247            | 506.129              | 516.350          | 515.824            | 0.24945                    | 0.42070                | 0.78162                    | 0.98872                |
| IVS;d (mm)                                    | 0.761              | 0.723                | 0.550            | 0.620              | 0.41391                    | 0.02983                | 0.08597                    | 0.47046                |
| IVS;s (mm)                                    | 1.127              | 0.999                | 0.590            | 0.766              | 0.12437                    | 0.00031                | 0.02347                    | 0.18413                |
| LVID;d (mm)                                   | 3.805              | 4.073                | 5.147            | 4.562              | 0.01260                    | 0.00017                | 0.00315                    | 0.05831                |
| LVID;s (mm)                                   | 2.480              | 2.933                | 4.669            | 3.875              | 0.03446                    | 0.00002                | 0.00187                    | 0.05630                |
| LVPW;d (mm)                                   | 0.758              | 0.705                | 0.574            | 0.662              | 0.12860                    | 0.14797                | 0.53525                    | 0.51941                |
| LVPW;s (mm)                                   | 1.208              | 1.007                | 0.726            | 0.859              | 0.01459                    | 0.01569                | 0.20443                    | 0.49983                |
| Cardiac Output (ml/min)                       | 22.247             | 20.608               | 12.709           | 14.637             | 0.58444                    | 0.00084                | 0.10802                    | 0.50446                |
| Stroke volume (µl)                            | 40.261             | 40.576               | 25.976           | 28.962             | 0.90023                    | 0.01269                | 0.04682                    | 0.63342                |
| %FS                                           | 34.874             | 28.265               | 9.851            | 15.301             | 0.10817                    | 0.00000                | 0.00602                    | 0.13259                |
| %EF                                           | 64.472             | 54.085               | 20.986           | 31.829             | 0.07883                    | 0.00000                | 0.00450                    | 0.12511                |
| LV Mass (mg)                                  | 101.447            | 102.050              | 110.968          | 110.544            | 0.75739                    | 0.36029                | 0.39572                    | 0.97565                |
| LV Vol;d (ul)                                 | 62.340             | 73.454               | 129.795          | 96.061             | 0.01267                    | 0.00073                | 0.00287                    | 0.05967                |
| LV Vol;s (ul)                                 | 22.280             | 34.431               | 106.225          | 66.427             | 0.02739                    | 0.00042                | 0.00134                    | 0.05844                |
| LA MI trace (mm)                              | 0.000              | 0.000                | 8.209            | 6.282              | 0.00000                    | 0.00000                | 0.00000                    | 0.05500                |
| LA LV lenght (mm)                             | 17.501             | 17.258               | 20.142           | 18.623             | 0.52427                    | 0.00146                | 0.02245                    | 0.03023                |
| SA MI trace (mm)                              | 0.000              | 0.000                | 4.693            | 3.156              | 0.00000                    | 0.00069                | 0.00000                    | 0.20409                |
| SA LV lenght (mm)                             | 11.277             | 12.266               | 15.268           | 14.079             | 0.01603                    | 0.00320                | 0.00178                    | 0.32613                |
| LV diastole area LA (mm <sup>2</sup> )        | 23.364             | 23.364               | 32.889           | 27.690             | 0.83288                    | 0.00046                | 0.01933                    | 0.03329                |
| LV systole area LA (mm <sup>2</sup> )         | 16.292             | 15.562               | 28.243           | 22.143             | 0.69639                    | 0.00013                | 0.00203                    | 0.02784                |
| LV diastole area SA (mm <sup>2</sup> )        | 10.074             | 11.835               | 18.695           | 15.219             | 0.02196                    | 0.00564                | 0.00271                    | 0.22225                |
| LV systole area SA (mm <sup>2</sup> )         | 3.609              | 6.771                | 15.810           | 11.022             | 0.00743                    | 0.00044                | 0.01499                    | 0.12270                |
| Fractional Area Change LA (%)                 | 30.651             | 33.639               | 14.569           | 20.418             | 0.67850                    | 0.00054                | 0.00153                    | 0.09861                |
| Fractional Area Change SA (%)                 | 64.268             | 44.057               | 17.862           | 28.748             | 0.00693                    | 0.00000                | 0.07641                    | 0.10606                |
| % MI length LA                                | 0.000              | 0.000                | 40.391           | 33.747             | 0.00000                    | 0.00000                | 0.00000                    | 0.11402                |
| % MI length SA                                | 0.000              | 0.000                | 29.031           | 86.231             | 0.00000                    | 0.00004                | 0.19686                    | 0.38532                |
| LVmass/BW                                     | 3.612              | 3.559                | 3.889            | 3.988              | 0.95453                    | 0.42791                | 0.20003                    | 0.82857                |

**Table S4. Echocardiographic parameters measured 7 and 28 days after MI in mice injected with GapMeRs 2 days and 9 days after MI.**

| 7 days post-MI                |                    |                      |                 |                    |         |                           |                      |                          |                       |
|-------------------------------|--------------------|----------------------|-----------------|--------------------|---------|---------------------------|----------------------|--------------------------|-----------------------|
|                               | (n=6)<br>CTRL sham | (n=6)<br>WISPER sham | (n=9)<br>CTRLmi | (n=9)<br>WISPER mi |         | CTRL sham/<br>WISPER sham | CTRL sham/<br>CTRLmi | WISPER sham/<br>WISPERmi | CTRL mi/<br>WISPER mi |
|                               | Average            |                      |                 |                    | p value |                           |                      |                          |                       |
| Body weight (g)               | 26.40              | 24.15                | 26.06           | 24.25              |         | 0.05158325905             | 0.72787141487        | 0.93653680871            | 0.10533498193         |
| Heart rate                    | 523.05             | 410.33               | 526.24          | 434.42             |         | 0.00730263132             | 0.92144053565        | 0.47303877758            | 0.00683884500         |
| IVS;d (mm)                    | 0.72               | 0.74                 | 0.51            | 0.70               |         | 0.36934055604             | 0.00443014917        | 0.44230809558            | 0.01237719223         |
| IVS;s (mm)                    | 1.04               | 1.03                 | 0.53            | 0.86               |         | 0.79589172890             | 0.00000291509        | 0.20352796377            | 0.00788565174         |
| LVID;d (mm)                   | 3.92               | 3.65                 | 5.31            | 4.52               |         | 0.06429074273             | 0.00008349795        | 0.00260574458            | 0.00776593311         |
| LVID;s (mm)                   | 2.68               | 2.57                 | 4.87            | 3.87               |         | 0.51431281574             | 0.00000370856        | 0.00329455959            | 0.01232343019         |
| LVPW;d (mm)                   | 0.68               | 0.71                 | 0.79            | 0.74               |         | 0.14721796457             | 0.45677431532        | 0.70302661890            | 0.67344967386         |
| LVPW;s (mm)                   | 1.06               | 1.06                 | 0.96            | 0.93               |         | 0.99844489881             | 0.59543189407        | 0.22736158300            | 0.83502750777         |
| Cardiac Output (ml/min)       | 20.37              | 12.85                | 12.59           | 11.05              |         | 0.01961169760             | 0.01969611734        | 0.29836555438            | 0.47028791592         |
| Stroke volume (µl)            | 37.87              | 31.82                | 24.61           | 25.86              |         | 0.08711722668             | 0.00960931146        | 0.07259114988            | 0.74513056305         |
| %FS                           | 31.64              | 29.74                | 8.45            | 15.41              |         | 0.53836105335             | 0.00000078755        | 0.00539831678            | 0.07003248976         |
| %EF                           | 59.69              | 57.57                | 18.39           | 31.41              |         | 0.63554297792             | 0.00000041233        | 0.00401301085            | 0.06026633875         |
| LV Mass (mg)                  | 99.60              | 88.29                | 144.45          | 126.48             |         | 0.09953549207             | 0.02649296004        | 0.00100166286            | 0.26868570963         |
| LV Vol;d(ul)                  | 67.20              | 56.63                | 138.00          | 95.07              |         | 0.05816154139             | 0.00032981263        | 0.00333170501            | 0.00841455620         |
| LV Vol;s(ul)                  | 27.09              | 24.38                | 113.97          | 68.88              |         | 0.48830456170             | 0.00006797125        | 0.00416442802            | 0.01152369920         |
| LA MI trace (mm)              | 0.00               | 0.00                 | 9.05            | 6.49               |         | 0.00000000000             | 0.00000002969        | 0.00000269122            | 0.01280551395         |
| LA LV lenght (mm)             | 18.51              | 18.08                | 22.56           | 20.95              |         | 0.49932568824             | 0.00000498961        | 0.00076123536            | 0.01136277439         |
| SA MI trace (mm)              | 0.00               | 0.00                 | 6.77            | 3.87               |         | 0.00000000000             | 0.00000124170        | 0.00002415105            | 0.00253690524         |
| SA LV lenght (mm)             | 11.49              | 11.19                | 16.47           | 13.96              |         | 0.48306058908             | 0.00002172457        | 0.00165855903            | 0.00629952614         |
| LV diastole area LA (mm2)     | 23.03              | 21.77                | 35.22           | 29.11              |         | 0.32862174328             | 0.00001487783        | 0.00185090928            | 0.00661563384         |
| LV systole area LA (mm2)      | 15.32              | 14.83                | 30.77           | 24.38              |         | 0.56440465352             | 0.00000170768        | 0.00075143158            | 0.01218595518         |
| LV diastole area SA (mm2)     | 10.44              | 9.97                 | 21.27           | 15.47              |         | 0.54094746602             | 0.00019148233        | 0.00327742977            | 0.01202636252         |
| LV systole area SA (mm2)      | 4.73               | 5.21                 | 18.18           | 12.54              |         | 0.57911034229             | 0.00000494016        | 0.00052183779            | 0.00820747320         |
| Fractional Area Change LA (%) | 33.43              | 31.51                | 12.81           | 16.77              |         | 0.54954444618             | 0.00000014166        | 0.00361263696            | 0.22573326543         |
| Fractional Area Change SA (%) | 54.82              | 48.50                | 14.27           | 19.90              |         | 0.31218279331             | 0.00000033812        | 0.00006835578            | 0.14330127851         |
| % MI length LA                | 0.00               | 0.00                 | 40.01           | 30.75              |         | 0.00000000000             | 0.00000000817        | 0.00000105760            | 0.02755230716         |
| % MI length SA                | 0.00               | 0.00                 | 40.77           | 27.18              |         | 0.00000000000             | 0.00000003964        | 0.00000464756            | 0.00450167575         |
| LVmass/BW                     | 3.79               | 3.66                 | 5.57            | 5.16               |         | 0.62001597394             | 0.02447207499        | 0.00002176357            | 0.51109177567         |

| 28 days post-MI               |                    |                      |                 |                    |         |                           |                      |                           |                       |
|-------------------------------|--------------------|----------------------|-----------------|--------------------|---------|---------------------------|----------------------|---------------------------|-----------------------|
|                               | (n=6)<br>CTRL sham | (n=6)<br>WISPER sham | (n=9)<br>CTRLmi | (n=9)<br>WISPER mi |         | CTRL sham/<br>WISPER sham | CTRL sham/<br>CTRLmi | WISPER sham/<br>WISPER mi | CTRL mi/<br>WISPER mi |
|                               |                    |                      |                 |                    | p value |                           |                      |                           |                       |
| Body weight (g)               | 28.18              | 27.79                | 28.45           | 28.96              |         | 0.71120661037             | 0.71408855279        | 0.38181800297             | 0.61003852878         |
| Heart rate                    | 579.00             | 545.59               | 530.92          | 534.35             |         | 0.25741392365             | 0.07496517727        | 0.71339524469             | 0.89565629413         |
| IVS;d (mm)                    | 0.82               | 0.72                 | 0.50            | 0.59               |         | 0.10098326585             | 0.00026642392        | 0.22695101414             | 0.34672174764         |
| IVS;s (mm)                    | 1.28               | 1.09                 | 0.57            | 0.72               |         | 0.04344714196             | 0.00001119649        | 0.02722120191             | 0.26097433112         |
| LVID;d (mm)                   | 3.76               | 3.82                 | 5.64            | 4.94               |         | 0.64369367973             | 0.00003684243        | 0.00007533994             | 0.02620473360         |
| LVID;s (mm)                   | 2.24               | 2.40                 | 5.16            | 4.22               |         | 0.45252511164             | 0.00000267777        | 0.00002314680             | 0.01655785688         |
| LVPW;d (mm)                   | 0.75               | 0.68                 | 0.72            | 0.78               |         | 0.00731042189             | 0.85002670169        | 0.39654804018             | 0.67151773233         |
| LVPW;s (mm)                   | 1.22               | 1.10                 | 0.92            | 0.96               |         | 0.16484502016             | 0.14123062591        | 0.43705308680             | 0.83731600553         |
| Cardiac Output (ml/min)       | 24.50              | 23.93                | 14.33           | 19.72              |         | 0.82794981294             | 0.00446234391        | 0.07944137033             | 0.04438193768         |
| Stroke volume (µl)            | 43.67              | 43.07                | 28.74           | 35.10              |         | 0.86014444350             | 0.01903144555        | 0.05837549396             | 0.22407072717         |
| %FS                           | 40.88              | 37.25                | 8.76            | 14.95              |         | 0.38063333567             | 0.00000016682        | 0.00000275060             | 0.01627921519         |
| %EF                           | 71.61              | 67.60                | 18.89           | 31.25              |         | 0.45276597512             | 0.0000008019         | 0.00000574455             | 0.01529745513         |
| LV Mass (mg)                  | 101.67             | 90.86                | 145.37          | 136.41             |         | 0.04834833487             | 0.01215271966        | 0.00333511698             | 0.57269185356         |
| LV Vol;d(ul)                  | 60.84              | 62.87                | 159.42          | 116.57             |         | 0.67259684371             | 0.00024596243        | 0.00034436125             | 0.03038084117         |
| LV Vol;s(ul)                  | 17.84              | 20.71                | 131.63          | 82.17              |         | 0.53810594758             | 0.00011774115        | 0.00044998251             | 0.02370673977         |
| LA MI trace (mm)              | 0.00               | 0.00                 | 9.73            | 7.47               |         | 0.00000000000             | 0.00000001419        | 0.00000013793             | 0.01880556204         |
| LA LV lenght (mm)             | 18.74              | 17.80                | 23.07           | 21.90              |         | 0.05439210787             | 0.00001125316        | 0.00000021351             | 0.04561962872         |
| SA MI trace (mm)              | 0.00               | 0.00                 | 7.32            | 4.16               |         | 0.00000000000             | 0.00000471223        | 0.00003381162             | 0.00456251201         |
| SA LV lenght (mm)             | 11.38              | 11.51                | 17.51           | 15.33              |         | 0.83914869485             | 0.00004573384        | 0.00000330270             | 0.01856568492         |
| LV diastole area LA (mm2)     | 22.43              | 21.57                | 37.55           | 32.40              |         | 0.45525033954             | 0.00003275187        | 0.00001111751             | 0.03437460217         |
| LV systole area LA (mm2)      | 12.62              | 13.67                | 33.23           | 27.37              |         | 0.49805428585             | 0.00000192223        | 0.00000597092             | 0.02431864057         |
| LV diastole area SA (mm2)     | 10.17              | 10.41                | 23.87           | 17.82              |         | 0.82042161524             | 0.00021986621        | 0.00014660728             | 0.02119013549         |
| LV systole area SA (mm2)      | 3.37               | 3.97                 | 20.57           | 13.81              |         | 0.32318172328             | 0.00001812596        | 0.00003564711             | 0.01395682533         |
| Fractional Area Change LA (%) | 43.96              | 36.58                | 11.57           | 15.73              |         | 0.18477653285             | 0.00000309884        | 0.00003740301             | 0.15363351387         |
| Fractional Area Change SA (%) | 67.31              | 61.80                | 14.66           | 23.29              |         | 0.17311822254             | 0.00000000004        | 0.00000198501             | 0.03149509332         |
| % MI length LA                | 0.00               | 0.00                 | 42.10           | 33.98              |         | 0.00000000000             | 0.00000000358        | 0.000000005048            | 0.03246553200         |
| % MI length SA                | 0.00               | 0.00                 | 41.10           | 26.91              |         | 0.00000000000             | 0.00000002339        | 0.00002730382             | 0.00552641172         |
| LVmass/BW                     | 3.62               | 3.28                 | 5.15            | 4.71               |         | 0.12896926191             | 0.02518469736        | 0.00307840966             | 0.44706670379         |

**Table S5. Characteristics of patient suffering from AOS and developing cardiac fibrosis.**

|                              | <b>Fibrosis Group</b> |                    |
|------------------------------|-----------------------|--------------------|
|                              | <b>Non Severe</b>     | <b>Severe</b>      |
| <b>n</b>                     | 11                    | 15                 |
| <b>CVF (Avg.)</b>            | 7.40                  | 26.38              |
| <b>Age (Avg.)</b>            | 71                    | 71.47              |
| <b>Gender</b>                | 10 Females; 1 Males   | 8 Females; 7 Males |
| <b>Hypertension</b>          | 8 Yes; 3 No           | 11 Yes; 4 No       |
| <b>Atrial fibrillation</b>   | 2 Yes; 9 No           | 8 Yes; 7 No        |
| <b>BMI (Avg.)</b>            | 28.95                 | 28.61              |
| <b>SBP (Avg.) (mm Hg)</b>    | 121.82                | 118.53             |
| <b>DBP (Avg.) (mm Hg)</b>    | 71.09                 | 67.67              |
| <b>HR (Avg.) (beats/min)</b> | 72.09                 | 77.47              |
| <b>LVMI (Avg.)</b>           | 125.57                | 155.15             |
| <b>LVH</b>                   | 5 Yes; 6 No           | 9 Yes; 6 No        |
| <b>RWT (Avg.)</b>            | 0.62                  | 0.62               |
| <b>AVAi (Avg.)</b>           | 0.32                  | 0.39               |
| <b>LVEDD (Avg.)</b>          | 4.14                  | 4.66               |
| <b>LVESD (Avg.)</b>          | 2.29                  | 3.11               |
| <b>LVEF (Avg.)</b>           | 75.44                 | 60.72              |
| <b>DT (Avg.)</b>             | 290.91                | 269.13             |
| <b>IVRT (Avg.)</b>           | 84.00                 | 119.13             |

BMI, body mass index  
 SBP, systolic blood pressure  
 DBP, diastolic blood pressure  
 HR, heart rate  
 LVMI, left ventricular mass index (g/m<sup>2</sup>)  
 LVH, LV hypertrophy  
 RWT, relative wall thickness  
 AVAi, aortic valve area index  
 LVEDD, LV end-diastolic diameter  
 LVESD, LV end-systolic diameter  
 LVEF, left ventricular ejection fraction  
 DT, deceleration time  
 IVRT, isovolumic relaxation time

**Table S6. List of the primers used in this study.**

| <b>PRIMER LIST</b> |                  |                               |                               |
|--------------------|------------------|-------------------------------|-------------------------------|
| <b>Species</b>     | <b>Gene Name</b> | <b>Forward primer (5'–3')</b> | <b>Reverse primer (5'–3')</b> |
| Mouse              | Wisper           | CTGCTTCTCCAAAAGCCAAG          | TAGACGAGCTGCTTCCCAGT          |
| Mouse              | Wisp2            | GTACCTGGATGGGGAGACCT          | TCCTGGCACCTGTATTCTCC          |
| Mouse              | XLOC_006255      | CAGATCTCTGCCCTCTGGAA          | ATTGGGATGACTGGCTGTGT          |
| Mouse              | XLOC_015277      | TGGGACAGCAGAGCTAAGGT          | AGATTCCAGCACGCACTTCT          |
| Mouse              | XLOC_015960      | GTGATGGAGGCTGAGCTAGG          | CAGGAGGAATGCCAAAAGAA          |
| Mouse              | XLOC_022878      | CTCAGGAGACTGGGAAGC            | AACCACTGGCTTTTGACA            |
| Mouse              | XLOC_025989      | GTACAGTCAGGGCCTCAAGC          | CCAGGAAGGAATTTGCAGAC          |
| Mouse              | Gapdh            | TGCACCACCAACTGCTTAGC          | GGCATGGACTGTGGTCATGAG         |
| Mouse              | Tubg1            | ATGCCGAGAGAAATCATCACCC        | CCGTGGCGAACTCTTCTACG          |
| Mouse              | Neat1            | TGGCCCCTTTTGTTCATTAGC         | TGGAAGGCCATTGTTTCAGG          |
| Mouse              | Xist             | GGAAAGCCCCAAGTAAAAGG          | CCAGGAACCATTCTTGCCTA          |
| Human              | WISPER           | CCATCTGTGGGACATCTGTG          | TGGGGGCTGTGGAGATAGTA          |
| Human              | WISP2            | ACAGCTGCCGGAACATAAAG          | GGTACGCACCTTTGAGAGGA          |
|                    |                  |                               |                               |
| <b>Species</b>     | <b>Gene Name</b> | <b>Taqman probe reference</b> | <b>Supplier</b>               |
| Mouse              | Ctgf             | Mm_01192931_g1                | Applied biosystem             |
| Mouse              | Col1a1           | Mm_00801666_g1                | Applied biosystem             |
| Mouse              | Col3a1           | Mm_00802331_m1                | Applied biosystem             |
| Mouse              | Fn1              | Mm_00692666_m1                | Applied biosystem             |
| Mouse              | Vim              | Mm_01333430_m1                | Applied biosystem             |
| Mouse              | Postn            | Mm_00450111_m1                | Applied biosystem             |
| Mouse              | a-SMA            | Mm_00725412_s1                | Applied biosystem             |
| Mouse              | Bcl2             | Mm_00477631_m1                | Applied biosystem             |
| Mouse              | Bax              | Mm_00432051_m1                | Applied biosystem             |
| Mouse              | Myh6             | Mm_00440354_m1                | Applied biosystem             |
| Mouse              | Myh7             | Mm_00600555_m1                | Applied biosystem             |
| Mouse              | Nppa             | Mm_01255747_g1                | Applied biosystem             |
| Mouse              | Nppb             | Mm_00435304_g1                | Applied biosystem             |
| Mouse              | Il6              | Mm_00446190_m1                | Applied biosystem             |
| Mouse              | Tgfb1            | Mm_01178820_m1                | Applied biosystem             |
| Mouse              | Tgfb2            | Mm_00436955_m1                | Applied biosystem             |
| Mouse              | Tnni3            | Mm_00437164_m1                | Applied biosystem             |
| Mouse              | Gapdh            | Mm99999915_g1                 | Applied biosystem             |
| Human              | COL1A1           | Hs.PT.58.15517795             | IDT                           |
| Human              | COL3A1           | Hs.PT.58.40254063             | IDT                           |
| Human              | FN1              | Hs.PT.58.21141138             | IDT                           |
| Human              | ASMA             | Hs.PT.56a.20825574            | IDT                           |
| Human              | 18S ribos. RNA   | Hs.PT.39a.222148556.g         | IDT                           |
| Human              | CTGF             | Hs00140014m1                  | Applied biosystem             |
| Human              | TGFB1            | Hs00998133m1                  | Applied biosystem             |

  

| <b>GapmeRs Sequences</b> |                  |                         |                 |
|--------------------------|------------------|-------------------------|-----------------|
| <b>Species</b>           | <b>Gene Name</b> | <b>Sequence (5'–3')</b> | <b>Supplier</b> |
| both                     | Negative CTRLA   | AACACGTCTATACGC         | Exiqon          |
| mouse                    | Mm_Wisper        | AGGTGTGCGATAGAG         | Exiqon          |
| mouse                    | Mm_Wisp2         | CGCAAGTGCCAAGAGT        | Exiqon          |
| human                    | Hu_WISPER        | CAAGAAGCTGGAGTTG        | Exiqon          |
